# Supplementary material
Source: PubMed Central journal article supplement (PMC5983216)
Supplement: EMBJ-37-e97499-s001.pdf [file EMBJ-37-e97499-s001.pdf]

## Appendix for

### SUPERMAN regulates floral whorl boundaries through control of auxin biosynthesis

**Authors:** Yifeng Xu<sup>1,2</sup>, Nathanaël Prunet<sup>3,4,5</sup>, Eng-Seng Gan<sup>1</sup>, Yanbin Wang<sup>1</sup>, Darragh Stewart<sup>6</sup>, Frank Wellmer<sup>3,6</sup>, Jiangbo Huang<sup>1,7</sup>, Nobutoshi Yamaguchi<sup>2,8</sup>, Yoshitaka Tatsumi<sup>2</sup>, Mikiko Kojima<sup>8,9</sup>, Takatoshi Kiba<sup>8,9</sup>, Hitoshi Sakakibara<sup>8,9</sup>, Thomas P. Jack<sup>5</sup>, Elliot M. Meyerowitz<sup>3,4</sup>, Toshiro Ito<sup>1,2,3,7</sup>

Correspondence to Toshiro Ito: itot@bs.naist.jp

#### Table of contents

**Appendix Figure S1** The expression of the functional *pSUP::SUP-3xVENUS* and *pSUP::SUP-GFP*

**Appendix Figure S2** Auxin is increased in *sup-5*

**Appendix Figure S3** The *sup-5* mutant phenotype is rescued by NPA treatment

**Appendix Figure S4** The morphology of *sup-5 pSUP::SUP-GR* plants after mock or DEX treatment

**Appendix Figure S5** The morphology of *p35S::SUP-GR* in different genetic backgrounds before and after DEX treatment

**Appendix Figure S6** The active histone modification H3K4me3 at the *YUC1/4* loci is increased in *sup*

**Appendix Figure S7** The coding regions of *YUC1* and *YUC4* prevent ectopic expression in the inflorescences

**Appendix Figure S8** *DR5* activity is reduced in *sup-5 yuc1*

**Appendix Figure S9** The *pPIN3::PIN3-GFP* expression pattern is not changed in *sup-5*

**Appendix Figure S10** The interaction between SUP with PcG components CLF and TFL2

**Appendix Figure S11** Spatial distribution of reporters at stage 4 floral buds in WT and *sup*

**Appendix Table S1** List of the down-regulated hormone metabolic process genes after the DEX treatment in the inflorescence of *p35S::SUP-GR*

**Appendix Table S2** List of the primers

**Appendix Table S3** List of genes showing a 2.0-fold change in expression after DEX treatment in the inflorescence of *p35S::SUP-GR*

## Appendix Figure S1

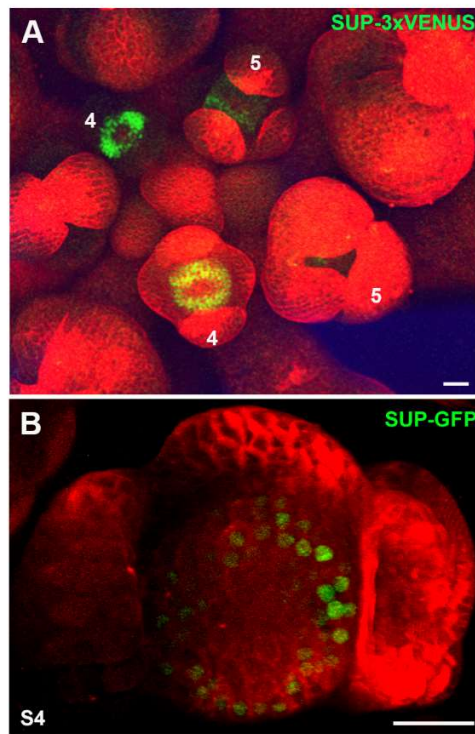

### Appendix Figure S1. The expression of the functional *pSUP::SUP-3xVENUS* and *pSUP::SUP-GFP*

(A) The expression of SUP-3xVENUS-N7 (green) in an inflorescence stained with FM 4-64 dye (red). *SUP* expression appears during late stage 3 (s3) but declines after stage 4 (s4); however, *SUP* expression is still detectable at stage 5 (s5). (B) The expression of SUP-GFP (green) with a weak signal in stage 4 floral buds stained with FM 4-64 dye (red). Scale bars, 20  $\mu$ m.

## Appendix Figure S2

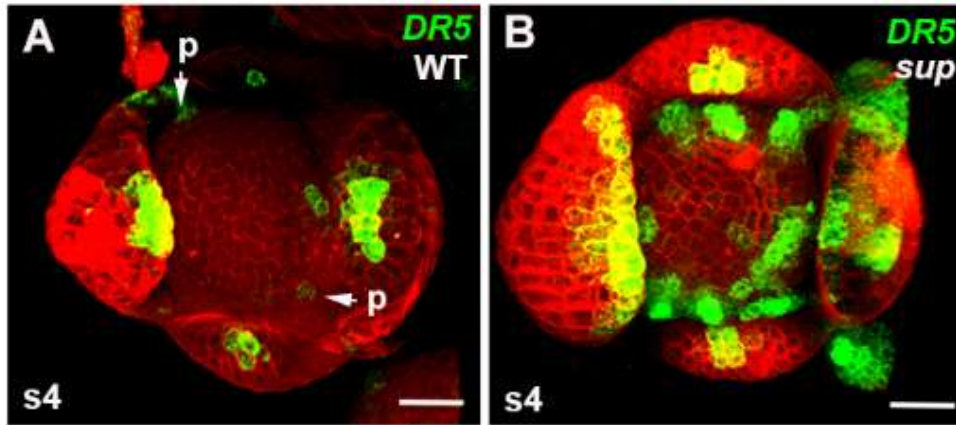

### Appendix Figure S2. Auxin is increased in *sup-5*

(A-B) The expression of the auxin marker *pDR5rev::GFP-ER* in stage 4 floral buds of WT (A) and *sup-5* (B). In the WT floral bud at stage 4, the fluorescence signal was detected mostly in the tips of sepals and at the sites (p, marked with arrows) where the petal primordia would emerge at later stages (A). In contrast, there were increased numbers of cells showing auxin signals in the *sup-5* floral buds at stage 4, coinciding with the SUP-expressing regions (B). Scale bars, 20  $\mu$ m.

### Appendix Figure S3

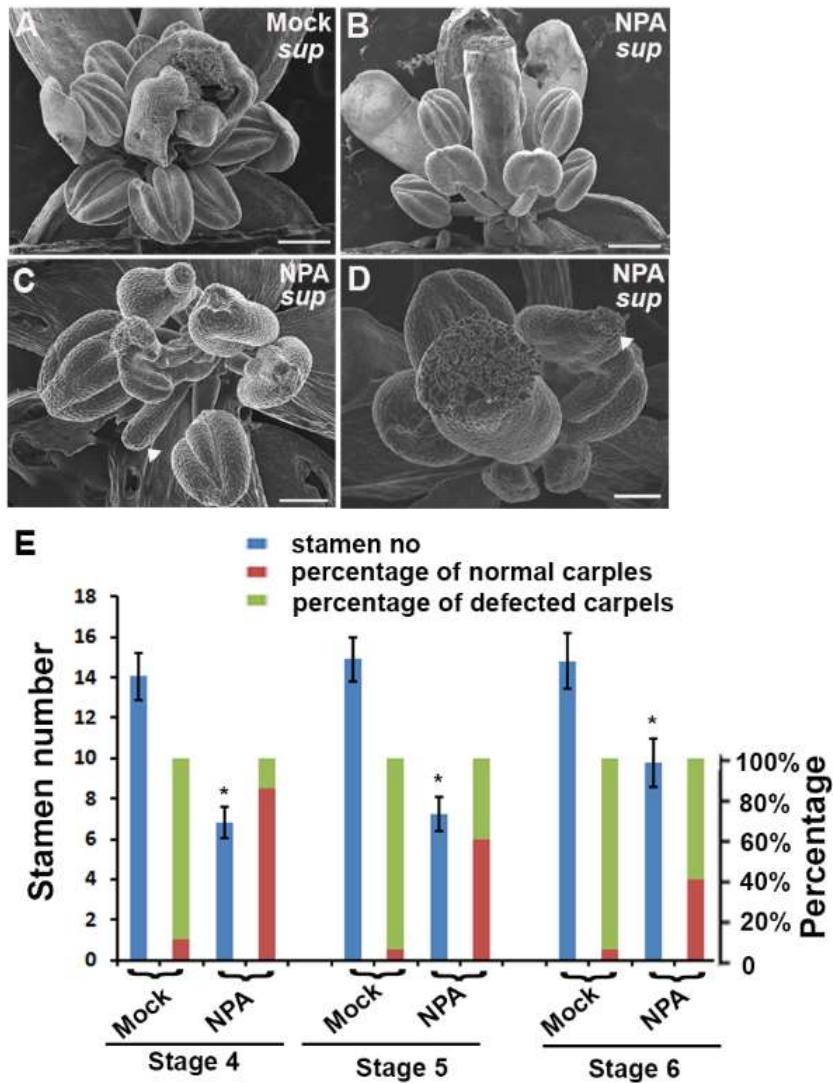

### Appendix Figure S3. The *sup-5* mutant phenotype is rescued by NPA treatment.

(A-D) The *sup-5* flowers after treatment with NPA (B-D) or a mock solutions (A). While the mock treatment did not affect *sup-5* flowers (A), the NPA treatment significantly rescued both carpels and stamens (B), sometimes with development arrestment (C-D). (E) The statistical analysis indicated that NPA treatment rescued stage 4-5 floral buds well, which took approximately 9-10 days to anthesis. \* indicates  $P < 0.05$  based on Student's t-test. Scale bars, 20  $\mu\text{m}$ .

### Appendix Figure S4

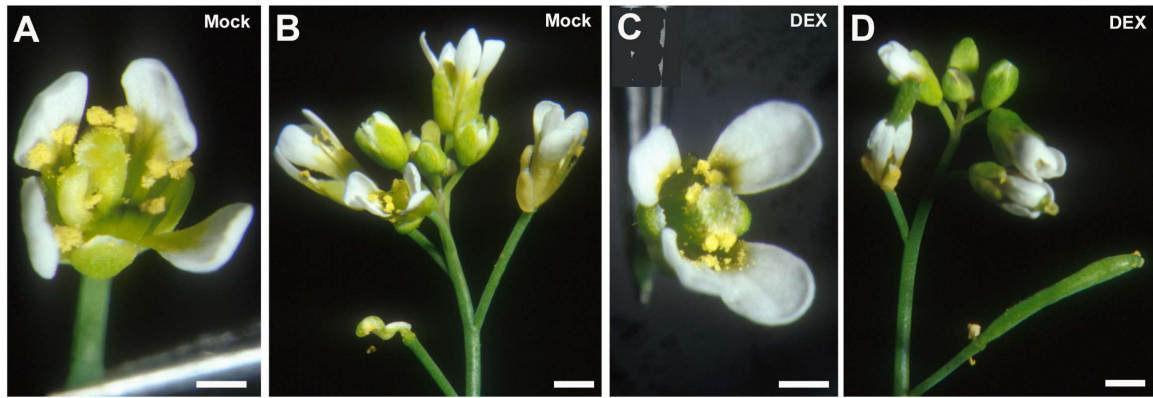

**Appendix Figure S4. The morphology of *sup-5 pSUP::SUP-GR* plants after mock or DEX treatment**  
**(A-B)** The *sup-5* mutant-like flower (A) and inflorescence (B) after the mock treatment. **(C-D)** The WT-like flower (C) and inflorescence (D) after the DEX treatment. Scale bars, 1 mm.

## Appendix Figure S5

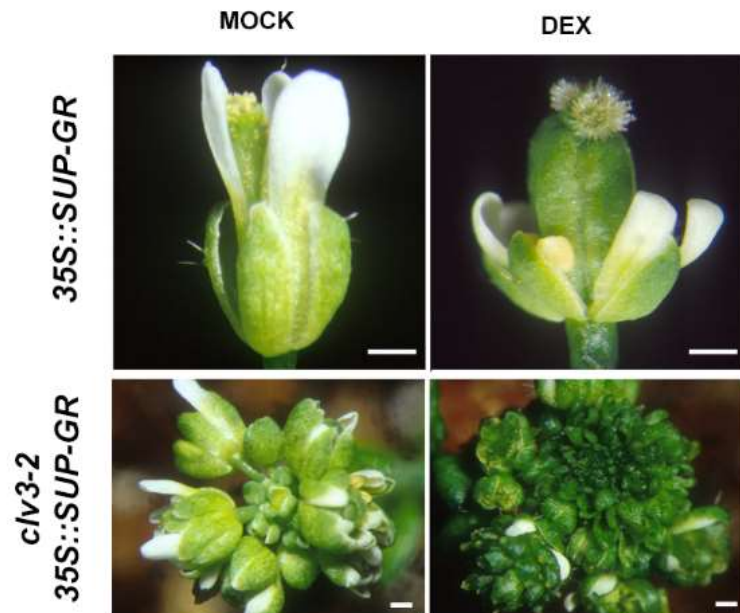

**Appendix Figure S5. The morphology of *p35S::SUP-GR* in different genetic backgrounds before and after DEX treatment**

Flowers or inflorescence of *p35S::SUP-GR* before and after DEX treatment. In WT, *p35S::SUP-GR* caused the increased carpels and reduced size of floral organs after DEX treatment. In *clv3-2*, ectopic expression of SUP promoted the differentiation of leaf-like tissues. Scale bars, 1 mm.

## Appendix Figure S6

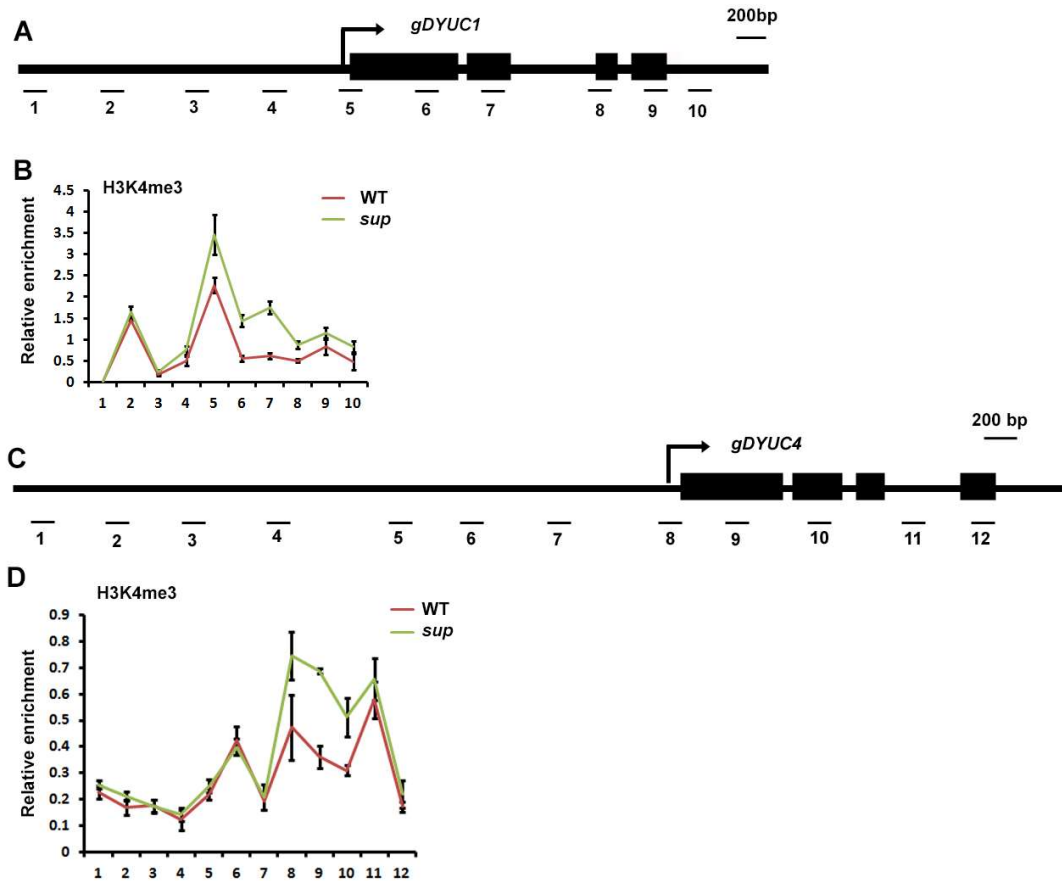

### Appendix Figure S6. The active histone modification H3K4me3 at the *YUC1/4* loci is increased in *sup*

(A) Schematic drawing of the *YUC1* genome structure showing regions of primer sets used for ChIP analyses. (B) Relative enrichment of H3K4me3 at the *YUC1* locus increased in the stage 4 floral buds of *ap1 cal p35S::API-GR sup-5* compared with that of the wild-type control from *ap1 cal p35S::API-GR*. (C) Schematic drawing of the *YUC4* gene structure showing regions amplified by primers used for ChIP analyses. (D) Relative enrichment of H3K4me3 increased at the *YUC4* locus in stage 4 floral buds of *ap1 cal p35S::API-GR sup-5* compared with that of the WT control. Error bars represent standard errors with three biological replicates.



### Appendix Figure S7

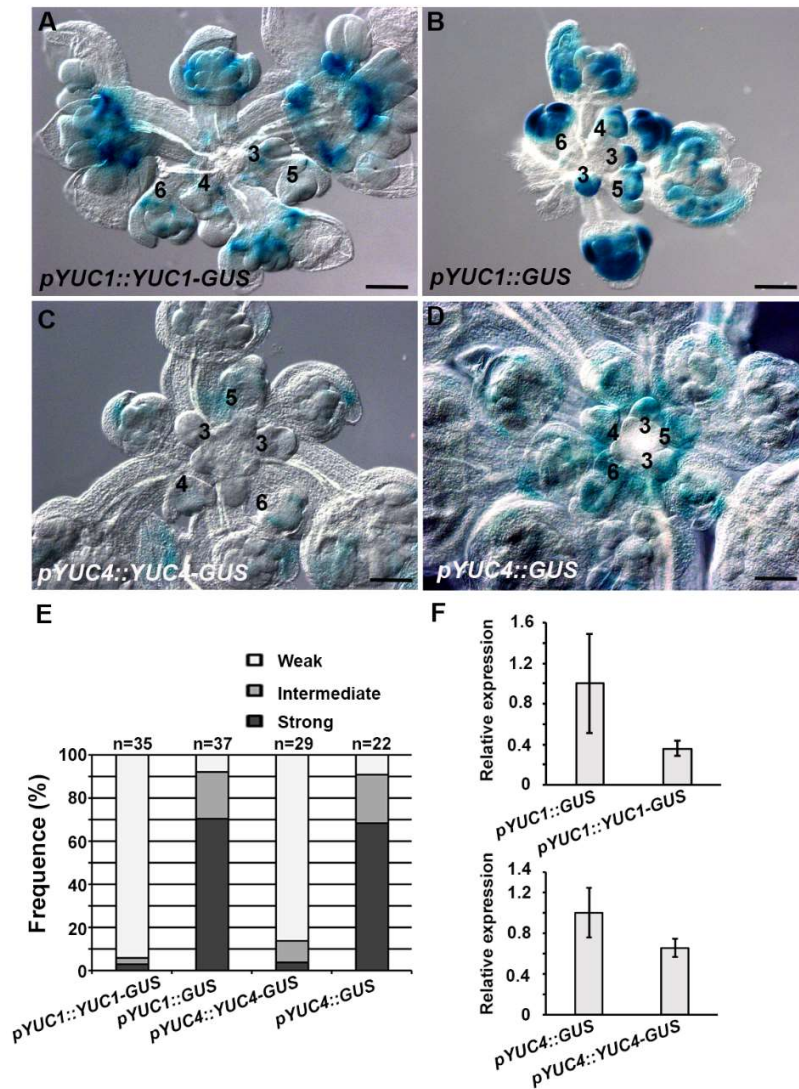

**Appendix Figure S7. The coding regions of *YUC1* and *YUC4* prevent ectopic expression in the inflorescences.**

**(A-B)** GUS staining of *pYUC1::YUC1-GUS* (A) and *pYUC1::GUS* (B) in young floral buds.

**(C-D)** GUS staining of *pYUC4::YUC4-GUS* (C) and *pYUC4::GUS* (D) in young floral buds.

**(E)** Visual scoring of *pYUC1::YUC1-GUS*, *pYUC1::GUS*, *pYUC4::YUC4-GUS* and *pYUC4::GUS* staining in the T1 population; the number (n) of tested T1 transgenic plants was listed for each construct.

**(F)** Relative expression of GUS transcript levels as determined by qRT-PCR. The GUS transcript levels in *pYUC1::GUS* and *pYUC4::GUS* are higher than those in *pYUC1::YUC1-GUS* and *pYUC4::YUC4-GUS*, respectively. Standard deviation was calculated based on the GUS transcript levels in three independent transgenic lines.

Scale bars, 0.02 mm.

## Appendix Figure S8

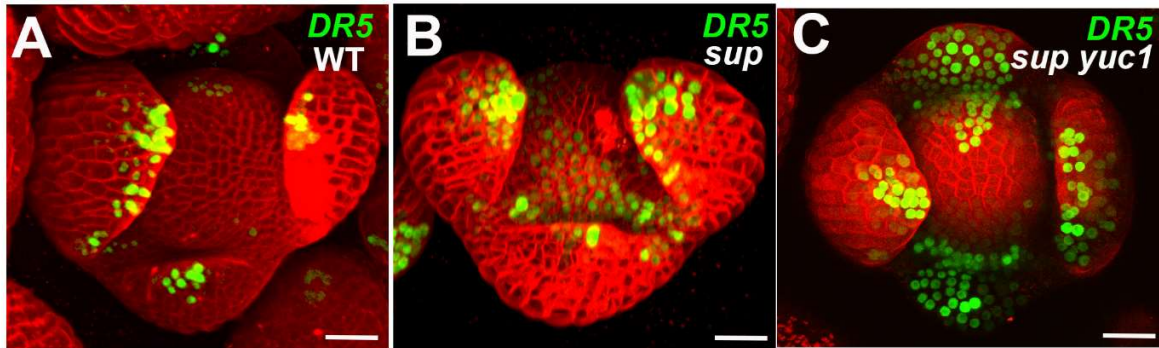

### Appendix Figure S8. *DR5* activity is reduced in *sup-5 yuc1*.

(A-C) The *pDR5rev::3xVENUS-N7* signal is reduced in *sup-5 yuc1* (C) compared with that in *sup-5* (B), but slightly more signals than that of WT (A).

Scale bars, 20  $\mu$ m.

Appendix Figure S9

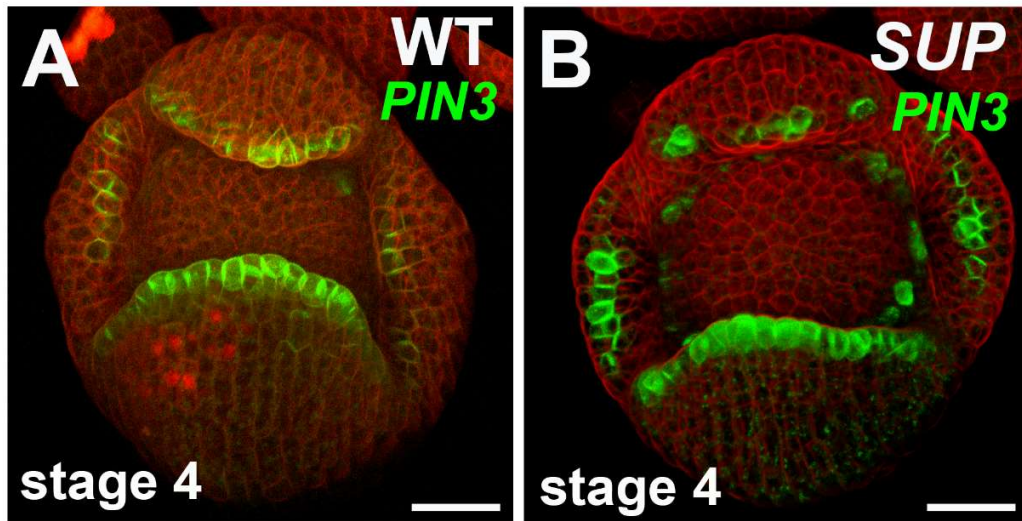

Appendix Figure S9. The *pPIN3::PIN3-GFP* expression pattern is not changed in *sup-5*.

(A) *pPIN3::PIN3-GFP* expression in a stage 4 WT floral bud.

(B) *pPIN3::PIN3-GFP* expression in a stage 4 *sup-5* floral bud.

Scale bars, 20  $\mu\text{m}$ .

### Appendix Figure S10

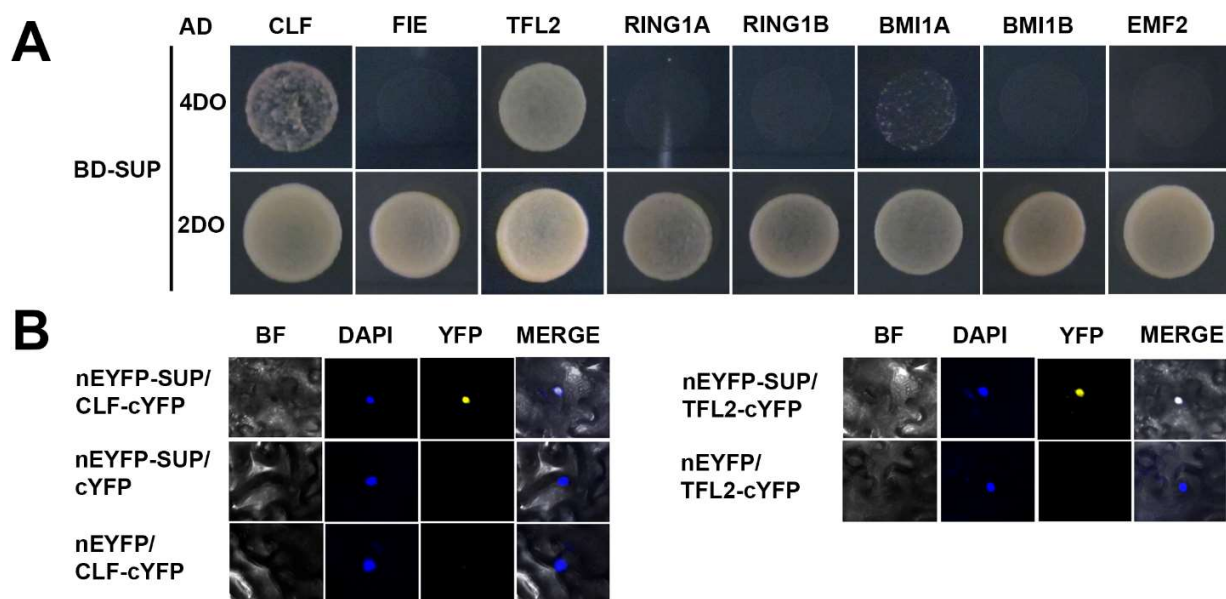

#### Appendix Figure S10. The interaction between SUP with PcG components CLF and TFL2

(A) Yeast two-hybrid assay showing that SUP interacts with CLF (without the C-terminal domain) and TFL2 but not with other chromatin remodelers, including RING1A/B, BMI1A/B, FIE and EMF2.

(B) BiFC analysis of SUP with CLF and TFL2 in tobacco epidermal cells. Yellow signal indicates the binding of SUP with CLF or with TFL2 in the nuclei. DAPI (4',6-diamidino-2-phenylindole) staining indicates nuclei.

Appendix Figure S11

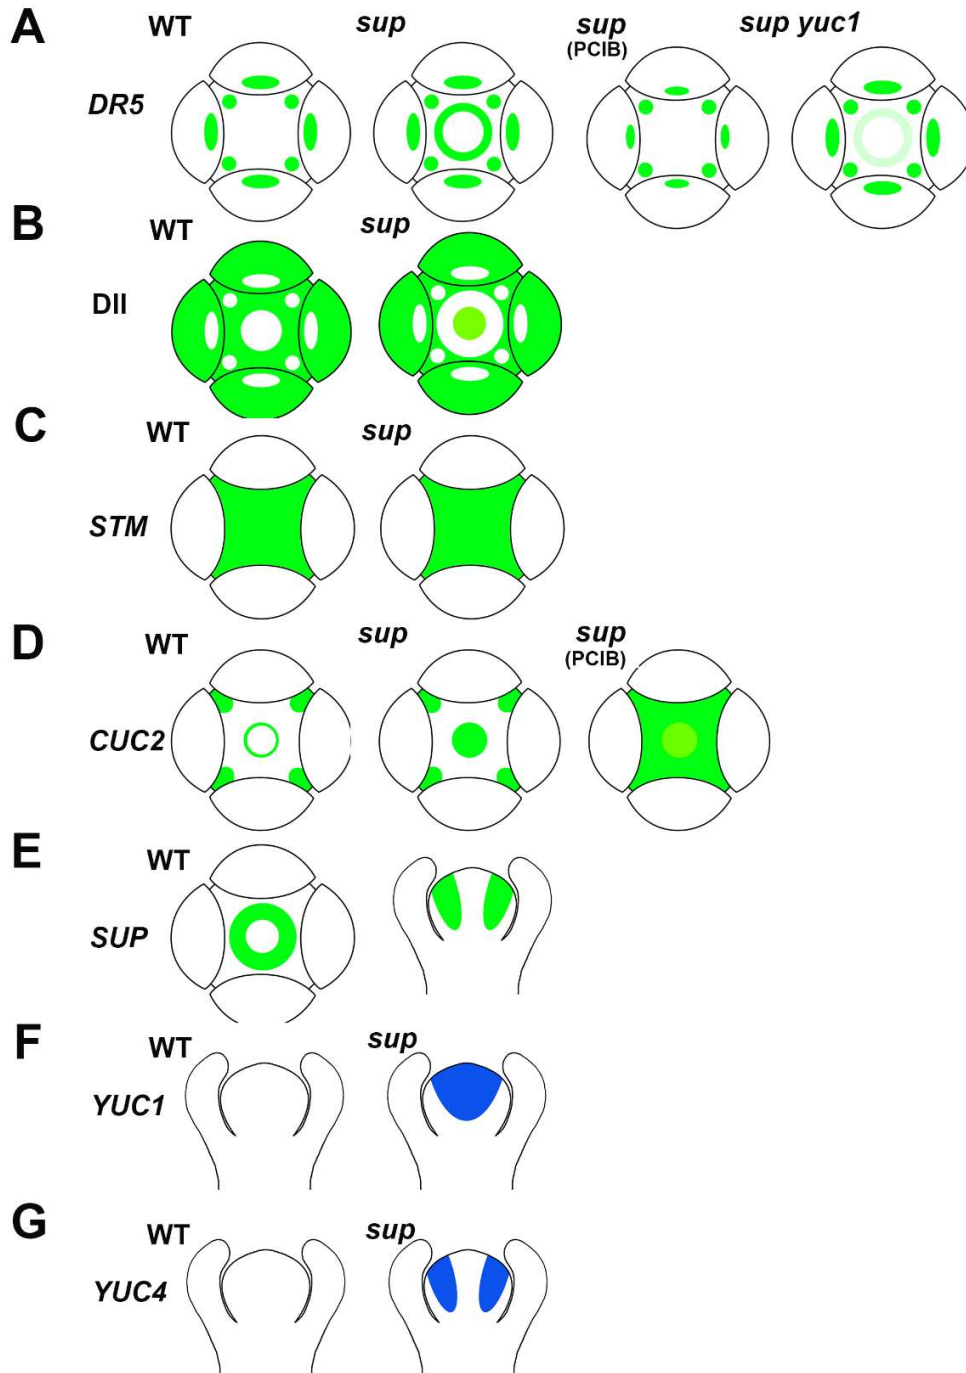

**Appendix Figure S11. Spatial distribution of reporters at stage 4 floral buds in WT and *sup***

**(A)** The *DR5* signal is expressed at the tips of sepals and petal initiation sites in WT, while it is ectopically expressed in whorl 3/4 boundaries in *sup* mutants. The PCIB treatment reduced the ectopic *DR5* signal in *sup*. The *yuc1* mutation also partially rescues the *DR5* signal in *sup yuc1*.

**(B)** The DII-VENUS is depleted at the tips of sepals, petal initiation sites, and the FM regions in WT, while in *sup* mutant, it is ectopically expressed in the FM region, and is depleted in the whorl 3/4 boundary regions.

**(C)** There is no obvious difference of *STM* expression between WT and *sup*, in which *STM* is highly expressed in the boundary region of sepals as well as the whole center region of the floral buds.

**(D)** At WT, *CUC2* is expressed in the boundary regions of sepals, as well as in narrow inner region of whorl 3/4 boundaries. In *sup*, *CUC2* is ectopically expressed in the FM region; PCIB treatment induce the *CUC2* expression in the whole center region of the floral buds, while the signal in the FM region is relatively lower.

**(E)** *SUP* is expressed in the whorl 3/4 boundary regions in WT floral buds at stage 4. Top view and side view to show the ring-like expression domain.

**(F)** *YUC1* is ectopically expressed at the whorl 3/4 boundaries as well the FM region in *sup*.

**(G)** *YUC4* is ectopically expressed at the whorl 3/4 boundary regions.

**Appendix Table S1: List of the down-regulated hormone metabolic process genes after the DEX treatment in the inflorescence of *p35S::SUP-GR***

| SEQ_ID           | DESCRIPTION                                                   | MOCK    | DEX     | Fold  |
|------------------|---------------------------------------------------------------|---------|---------|-------|
| <b>AT5G36140</b> | CYP716A2                                                      | 3.18763 | 1.68883 | 2.826 |
| <b>AT4G24670</b> | TAR2 (TRYPTOPHAN AMINOTRANSFERASE RELATED 2)                  | 5.3471  | 4.34155 | 2.007 |
| <b>AT1G49500</b> | transcription initiation factor TFIID subunit 1b-like protein | 4.00798 | 1.68103 | 5.017 |
| <b>AT5G42650</b> | AOS (ALLENE OXIDE SYNTHASE)                                   | 5.71311 | 4.51067 | 2.301 |
| <b>AT5G66040</b> | STR16 (SULFURTRANSFERASE PROTEIN 16)                          | 5.62066 | 4.44481 | 2.259 |
| <b>AT5G11320</b> | YUC4 (YUCCA4); monooxygenase/ oxidoreductase                  | 6.28895 | 5.1269  | 2.237 |
| <b>AT4G32540</b> | YUC1 (YUCCA 1)                                                | 6.80192 | 5.39371 | 2.654 |
| <b>AT3G26830</b> | PAD3 (PHYTOALEXIN DEFICIENT 3)                                | 3.18479 | 2.17741 | 2.01  |
| <b>AT1G28130</b> | GH3.17; indole-3-acetic acid amido synthetase                 | 6.31214 | 4.73973 | 2.974 |
| <b>AT2G20520</b> | FLA6 (FASCICLIN-LIKE ARABINOGALACTAN 6)                       | 3.90284 | 2.64943 | 2.384 |
| <b>AT4G14580</b> | CIPK4 (CBL-interacting protein kinase 4)                      | 2.53159 | 1.46203 | 2.098 |
| <b>AT3G47210</b> | unknown protein                                               | 1.05469 | 0.01337 | 2.058 |
| <b>AT2G41510</b> | CKX1 (CYTOKININ OXIDASE/DEHYDROGENASE 1)                      | 6.97201 | 5.76473 | 2.309 |
| <b>AT2G36800</b> | DOGT1 (DON-GLUCOSYLTRANSFERASE 1)                             | 7.78674 | 6.07959 | 3.265 |
| <b>AT1G05680</b> | UDP-glucuronosyl/UDP-glucosyl transferase family protein      | 7.45292 | 5.77195 | 3.206 |
| <b>AT1G44350</b> | ILL6                                                          | 8.32588 | 7.05669 | 2.41  |
| <b>AT5G56970</b> | CKX3 (CYTOKININ OXIDASE 3)                                    | 6.33592 | 5.19702 | 2.202 |

Notes: The list of down-regulated genes belong to "hormone metabolic process" (GO: 0042445). Among these, genes marked in green belong to auxin biosynthesis genes (GO: 0009851) and both genes marked either in green or in black belong to hormone biosynthesis genes (GO: 0042446).



**Appendix Table S2: List of the primers (shown from 5'- to 3'- ends)**

|                     |                                       |
|---------------------|---------------------------------------|
| gDSUP-F             | caccCATAATGGTTTGTGTTACAGTCACG         |
| gDSUP-R             | GTATTCACAAACAACAGAAGCCTTG             |
| mSUP-sfoI           | gagcttgacatATGggcgccGAGAGATCAAACAGC   |
| mSUP-sfoI           | GCTGTTTGATCTCTCggcgccCATatgtgcaagctc  |
| IAAH-sfoI-F         | ggcgccGTGGCCATTACCTCGTTAG             |
| IAAH-sfoI-R         | ggcgccTTAATTGGGTAAACCGGCAA            |
| gDCLF-F             | tccccgggTCCTAAGGTCCACCACGAAGA         |
| gDCLF-R             | ggcgcgccTGGGGCACACCTTATCTCAC          |
| mCLF-sfoI           | ggtttcttgacaATGggcgccGCGTCAGAAGCTTCGC |
| mCLF-sfoI           | GCGAAGCTTCTGACGCggcgccCATtgtcaagaaacc |
| 3HA-sfoI-F          | ggcgccACTAGTTACCCATACGATGTT           |
| 3HA-sfoI-R          | ggcgccTCTAGAAGCGTAATCTGGAAC           |
| RT-YUC1-F           | CTACTTGGCTTCAGGGAGGTG                 |
| RT-YUC1-R           | CACCAATTTCCGCCAGCGATC                 |
| RT-YUC4-F           | CTCTGCCTCATATGGTCGTTAG                |
| RT-YUC4-R           | GTCGGTATTGCCAACGTAG                   |
| RT-PIN3-F           | CGCCGAGAATGGTCTAAAC                   |
| RT-PIN3-R           | GGTTTCTGATGAGTTTCCTCC                 |
| RT-PIN4-F           | CAACAACGGAACACATATGCC                 |
| RT-PIN4-R           | CCACCGGTAAGCAACAAGAG                  |
| SALK_106293 yuc1-LP | AAGTTTTGGTTGTCGGATGTG                 |
| SALK_106293 yuc1-RP | GTTGCTTTTGTAAACCAGTGGC                |
| SALK_047083 yuc4-LP | ACCATATGAGGCAGAGCATTG                 |
| SALK_047083 yuc4-RP | ATGGCAAAGATTTTCCAGTG                  |
| LBb1.3              | ATTTTGCCGATTTCCGGAAC                  |
| gDYUC1-F            | CACCggccttttctattccttcgtccca          |
| ProYUC1-R           | GAGACTCCATtcttgatgatgatgg             |
| gDYUC1-R            | gAGAGGTAAAGACAAAACGAGAACTGC           |
| ProYUC4-R           | CTCTACAAGTGCCCATgtcgactaa             |
| gDYUC4-R            | cGGATTTATTGAAATGAAGATGAATA            |
| gDYUC4-F            | caccGCTTGGAAGGCAATTATCCTAACCG         |
| YUC1-ChIP1          | GGGACGGAGGGAATATATTGTATGG             |
| YUC1-ChIP1          | GATGATTTTATGAGCCCATAGTAAACTG          |
| YUC1-ChIP2          | CAAATCAAATGGGAAGAAGAGCG               |
| YUC1-ChIP2          | AAAGAGTGGTGAAAGAGGCATTGG              |
| YUC1-ChIP3          | GGACACGAATGTTTATTGAATTATACC           |
| YUC1-ChIP3          | CACGGTGATTTAAACAAAACAAAACACTG         |

|                      |                                   |
|----------------------|-----------------------------------|
| YUC1-ChIP4           | AATATAGAACAGAATTGGAGTCGGTC        |
| YUC1-ChIP4           | GGTTTTCATTTGTGATTTGGGTTTG         |
| YUC1-ChIP5           | TTCTGGTCTTGCCACTTCAGCATGT         |
| YUC1-ChIP5           | GGCAAAAGTGTTTTGGGAGATGGAG         |
| YUC1-ChIP6           | CATCTTGTTGTCCGGAACACCGTAA         |
| YUC1-ChIP6           | ATCTCCCTTGGCAACACATGAACCT         |
| YUC1-ChIP7           | ATTGATGGCCAATCTTTCGTTTGGGA        |
| YUC1-ChIP7           | TGCCGGATCTGATGAGAGACATAGC         |
| YUC1-ChIP8           | AAGCAACGTGCCTACTTGGCTTCAG         |
| YUC1-ChIP8           | GGCCGTTGATGTTAATTTGTTTTTGA        |
| YUC1-ChIP9           | ACGAGAAGAGGACTCCTTGGAACGG         |
| YUC1-ChIP9           | AACTGCACATATTCCTGGTGGACCC         |
| YUC1-ChIP10          | TGCAGACGTAAGGAAGAGGGAGGAA         |
| YUC1-ChIP10          | GGTAGAAAGAGATCGTCCATTGCGG         |
| YUC4-ChIP1           | GCTTGGAAGGCAATTATCCTAACCG         |
| YUC4-ChIP1           | CATGTAAGAATCAACGGCTTCTGCG         |
| YUC4-ChIP2           | GACATGAGAGGAGTCGAGTTGCTGA         |
| YUC4-ChIP2           | TCTTGCAAGGCCATGTAAATGTGA          |
| YUC4-ChIP3           | CCTCGTCTAACCAAAGGGACCATCA         |
| YUC4-ChIP3           | GAGCCTAGACTCATGACTAAGCTGGAAGA     |
| YUC4-ChIP4           | TTTTTCTTCCAGCTTAGTCATGAGTCTAGG    |
| YUC4-ChIP4           | TGCATGCTTGGTATAATAGAATGGTCC       |
| YUC4-ChIP5           | TTCGATTAAATAATACCCAGAAAGCAAG      |
| YUC4-ChIP5           | GCATTGCATGCTAAACCTCATCTC          |
| YUC4-ChIP6           | TAAATGTGATGTTGTTGCGTCCAG          |
| YUC4-ChIP6           | GACCTCCACTTCCCCTATGATCTC          |
| YUC4-ChIP7           | TACTTGACCCCAACAACTTTCGG           |
| YUC4-ChIP7           | AACACTAAAACGAACATCCGCTAAC         |
| YUC4-ChIP8           | CTTAGGTGCATGTGTGTGTGATCG          |
| YUC4-ChIP8           | TGCCCATGTGCGACTAATAAAAGCG         |
| YUC4-ChIP9           | AACTTCCCCAAATACCCATCCAAGC         |
| YUC4-ChIP9           | CCATAGACCAGATGCGTCATCGAAC         |
| YUC4-ChIP10          | GTTGGGCAATACCGACCTTTTAGGC         |
| YUC4-ChIP10          | GATCGGATTAAAGAAATGGCACCGA         |
| YUC4-ChIP11          | TCAAGAATAACGGTGATGCTGATGG         |
| YUC4-ChIP11          | TGTTCCCTTTGTTGCATGTGTTGTG         |
| YUC4-ChIP12          | CGTTTCCTAACGGATGGAAAGGAGA         |
| YUC4-ChIP12          | TATCCTCAGCGATCTTAACGGCGTC         |
| SUP-BD-F-NdeI        | CTGCATATGATGGAGAGATCAAACAGCATAGAG |
| SUP-BD-R-EcoRI       | AGTGAATTCTTAAGCGAAACCCAAACGGAGTTC |
| SUP-BD1-102-R-EcoR I | CCGAATTCATGAGGAGGAGGAGAGTTTGC     |
| SUP-BD89-205-F-EcoR1 | CCGAATTCCTTCTCCTCCTTACCCTAACCCCT  |

|                      |                                            |
|----------------------|--------------------------------------------|
| SUP-BD176-205-F-NdeI | CTGCATATGGAAATCATCAGCTTGGAGCT              |
| SUP-nEYFP-F-Bgl II   | CTCAGATCTATGGAGAGATCAAACAGCATAGAG          |
| SUP-nEYFP-R-XmaI     | CACCCGGGTAAAGCGAAACCCAAACGGAGTTC           |
| SUP-mEAR1-F          | GAATCAGAGCAAGATgcGGATgcAGAAgcCCGTgcGGGTTTC |
| SUP-mEAR1-R          | TTAAGCGAAACCCgcACGGgcTTCTgcATCCgcATCTTGCTC |
| SUP-mEAR2-F          | GAATCAGAGCAAGATgcGGATgcAGAAgcCCGTTTGG      |
| SUP-mEAR2-R          | AGCGAAACCCAAACGGgcTTCTgcATCCgcATCTTGC      |
| FIE-AD-F-NdeI        | GTCATATGATGTCGAAGATAACCTTAGGGA             |
| FIE-AD-R-XmaI        | CACCCGGGCTACTTGGTAATCACGTCCCA              |

**Appendix Table S3** List of genes showing a 2.0-fold change in expression after DEX treatment in the inflorescence of *p35S::SUP-GR*

| SEQ_ID    | MOCK    | DEX     | Fold change |
|-----------|---------|---------|-------------|
| AT1G01020 | 2.89278 | 1.88874 | 2.005 down  |
| AT1G01420 | 2.24565 | 1.08227 | 2.239 down  |
| AT1G01600 | 9.35142 | 7.77069 | 2.991 down  |
| AT1G01900 | 7.24165 | 6.0142  | 2.341 down  |
| AT1G02630 | 6.89293 | 5.5364  | 2.560 down  |
| AT1G02850 | 9.88727 | 8.06493 | 3.536 down  |
| AT1G03580 | 2.09131 | 0.99119 | 2.143 down  |
| AT1G05100 | 5.86797 | 4.07888 | 3.455 down  |
| AT1G05420 | 8.35119 | 5.78067 | 5.940 down  |
| AT1G05577 | 3.52498 | 2.16289 | 2.570 down  |
| AT1G05680 | 7.45292 | 5.77195 | 3.206 down  |
| AT1G07500 | 4.09261 | 2.13528 | 3.883 down  |
| AT1G07985 | 2.34221 | 0.86289 | 2.788 down  |
| AT1G08630 | 2.82209 | 1.677   | 2.211 down  |
| AT1G08920 | 1.12568 | 0.38023 | 2.840 down  |
| AT1G08990 | 3.06194 | 1.90921 | 2.223 down  |
| AT1G10540 | 8.94795 | 6.99561 | 3.870 down  |
| AT1G10745 | 1.82136 | 0.37276 | 2.729 down  |
| AT1G11440 | 6.47214 | 4.94703 | 2.878 down  |
| AT1G11925 | 2.06742 | 0.86993 | 2.293 down  |
| AT1G13290 | 6.76007 | 5.18378 | 2.982 down  |
| AT1G13650 | 5.74918 | 4.58968 | 2.233 down  |
| AT1G13670 | 2.33858 | 0.83699 | 2.831 down  |
| AT1G14280 | 6.29481 | 5.24047 | 2.076 down  |
| AT1G14760 | 5.148   | 3.08474 | 4.179 down  |
| AT1G17310 | 2.73507 | 1.52246 | 2.317 down  |
| AT1G17830 | 5.2505  | 3.74921 | 2.830 down  |
| AT1G18191 | 2.17745 | 1.04261 | 2.195 down  |
| AT1G18710 | 2.64532 | 1.28601 | 2.565 down  |
| AT1G18740 | 7.09774 | 6.04093 | 2.080 down  |
| AT1G18750 | 4.19672 | 2.74182 | 2.741 down  |
| AT1G18810 | 5.0281  | 3.99907 | 2.040 down  |
| AT1G18980 | 2.26664 | 0.97328 | 2.450 down  |
| AT1G19640 | 8.25596 | 6.95866 | 2.457 down  |
| AT1G19890 | 3.80929 | 2.19813 | 3.054 down  |
| AT1G20240 | 2.34877 | 1.26602 | 2.118 down  |
| AT1G20680 | 5.7583  | 4.61807 | 2.204 down  |
| AT1G21120 | 4.07872 | 2.70248 | 2.595 down  |
| AT1G21130 | 4.85744 | 3.7262  | 2.190 down  |

|           |         |         |       |      |
|-----------|---------|---------|-------|------|
| AT1G21270 | 6.3741  | 4.70047 | 3.190 | down |
| AT1G21540 | 9.36624 | 6.35393 | 8.068 | down |
| AT1G22380 | 4.78404 | 3.59384 | 2.281 | down |
| AT1G22420 | 3.19798 | 2.12751 | 2.100 | down |
| AT1G22590 | 1.08323 | 0.25381 | 2.526 | down |
| AT1G22885 | 3.51206 | 2.16739 | 2.539 | down |
| AT1G22910 | 6.00054 | 4.93233 | 2.096 | down |
| AT1G23420 | 4.3418  | 2.33156 | 4.028 | down |
| AT1G24110 | 3.0069  | 1.63873 | 2.581 | down |
| AT1G25275 | 8.34527 | 7.04442 | 2.463 | down |
| AT1G25310 | 1.70761 | 0.60416 | 2.148 | down |
| AT1G26770 | 6.83936 | 5.61583 | 2.335 | down |
| AT1G26795 | 1.76894 | 0.65298 | 2.167 | down |
| AT1G26945 | 6.18092 | 4.58627 | 3.020 | down |
| AT1G27020 | 4.8035  | 3.77977 | 2.033 | down |
| AT1G28130 | 6.31214 | 4.73973 | 2.974 | down |
| AT1G28290 | 3.13925 | 1.8452  | 2.452 | down |
| AT1G28306 | 1.90003 | 0.87299 | 2.037 | down |
| AT1G29395 | 8.9304  | 6.2411  | 6.450 | down |
| AT1G29510 | 2.61718 | 1.4032  | 2.319 | down |
| AT1G29720 | 2.39238 | 1.28378 | 2.156 | down |
| AT1G30100 | 4.24526 | 1.46905 | 6.850 | down |
| AT1G30780 | 6.28893 | 5.0517  | 2.357 | down |
| AT1G31270 | 1.44723 | 0.06715 | 2.602 | down |
| AT1G31520 | 1.68697 | 0.44959 | 2.357 | down |
| AT1G32350 | 2.65562 | 1.36049 | 2.453 | down |
| AT1G32690 | 5.10794 | 3.75138 | 2.560 | down |
| AT1G33160 | 1.99811 | 0.77015 | 2.342 | down |
| AT1G33240 | 9.23293 | 7.75071 | 2.793 | down |
| AT1G33590 | 9.09804 | 8.08163 | 2.022 | down |
| AT1G33700 | 8.20214 | 7.16387 | 2.053 | down |
| AT1G33750 | 2.62623 | 0.62818 | 3.994 | down |
| AT1G33790 | 5.8773  | 4.39283 | 2.798 | down |
| AT1G33900 | 1.88855 | 0.6379  | 2.379 | down |
| AT1G35360 | 2.34407 | 1.11752 | 2.340 | down |
| AT1G35560 | 5.90628 | 4.78709 | 2.172 | down |
| AT1G37140 | 1.80524 | 0.555   | 2.378 | down |
| AT1G40091 | 2.12409 | 0.63586 | 2.805 | down |
| AT1G41850 | 2.78489 | 1.7534  | 2.044 | down |
| AT1G43763 | 3.60437 | 2.28983 | 2.487 | down |
| AT1G44045 | 3.33071 | 1.40715 | 3.793 | down |
| AT1G44350 | 8.32588 | 7.05669 | 2.410 | down |
| AT1G46480 | 5.55724 | 3.95507 | 3.035 | down |

|           |         |         |       |      |
|-----------|---------|---------|-------|------|
| AT1G47625 | 0.97778 | 0.12968 | 2.154 | down |
| AT1G47730 | 3.94011 | 2.8742  | 2.093 | down |
| AT1G47780 | 1.58847 | 0.55568 | 2.045 | down |
| AT1G49440 | 1.91359 | 0.33389 | 2.989 | down |
| AT1G49500 | 4.00798 | 1.68103 | 5.017 | down |
| AT1G50580 | 3.86474 | 2.81565 | 2.069 | down |
| AT1G50680 | 4.43723 | 3.40287 | 2.048 | down |
| AT1G51000 | 1.36499 | 0.28311 | 2.116 | down |
| AT1G51090 | 5.60541 | 4.50771 | 2.140 | down |
| AT1G52470 | 1.383   | 0.23714 | 2.212 | down |
| AT1G52565 | 3.7271  | 2.02109 | 3.262 | down |
| AT1G52690 | 5.68139 | 4.22157 | 2.750 | down |
| AT1G53160 | 7.06491 | 5.6351  | 2.694 | down |
| AT1G53282 | 1.49647 | 0.04495 | 2.910 | down |
| AT1G54575 | 6.2262  | 5.18433 | 2.058 | down |
| AT1G55600 | 2.3185  | 1.27278 | 2.064 | down |
| AT1G55700 | 2.37701 | 0.95932 | 2.671 | down |
| AT1G56100 | 1.30803 | -0.1036 | 2.660 | down |
| AT1G56630 | 2.32634 | 0.28409 | 4.118 | down |
| AT1G57750 | 8.75939 | 6.21512 | 5.833 | down |
| AT1G57990 | 5.10296 | 3.88566 | 2.325 | down |
| AT1G58007 | 1.4378  | 0.09255 | 2.888 | down |
| AT1G59530 | 2.16142 | 1.15102 | 2.014 | down |
| AT1G59730 | 2.21542 | 1.15158 | 2.090 | down |
| AT1G60060 | 8.09327 | 4.96254 | 8.758 | down |
| AT1G60630 | 5.95168 | 4.61557 | 2.524 | down |
| AT1G61760 | 4.0897  | 2.86322 | 2.339 | down |
| AT1G62320 | 2.79493 | 1.45633 | 2.529 | down |
| AT1G62710 | 5.59394 | 4.51998 | 2.105 | down |
| AT1G62770 | 4.89805 | 2.90916 | 3.969 | down |
| AT1G62975 | 2.46611 | 1.15    | 2.489 | down |
| AT1G63040 | 1.69308 | 0.09901 | 3.018 | down |
| AT1G63600 | 1.58555 | 0.48773 | 2.140 | down |
| AT1G64700 | 4.6106  | 3.58361 | 2.037 | down |
| AT1G65120 | 4.3532  | 3.28537 | 2.096 | down |
| AT1G65352 | 1.19188 | 0.06664 | 2.392 | down |
| AT1G65385 | 4.89173 | 3.87269 | 2.026 | down |
| AT1G65480 | 3.53955 | 1.9918  | 2.923 | down |
| AT1G66230 | 2.43751 | 0.79359 | 3.125 | down |
| AT1G66280 | 2.01097 | 0.45248 | 2.945 | down |
| AT1G66290 | 0.58204 | 0.42485 | 2.009 | down |
| AT1G66390 | 2.24687 | 0.7954  | 2.734 | down |
| AT1G66725 | 4.51187 | 2.43629 | 4.215 | down |

|           |         |         |        |      |
|-----------|---------|---------|--------|------|
| AT1G66760 | 6.4519  | 5.16854 | 2.434  | down |
| AT1G66830 | 1.29382 | 0.18197 | 2.161  | down |
| AT1G66930 | 4.98857 | 2.63323 | 5.117  | down |
| AT1G66940 | 5.94363 | 3.93895 | 4.013  | down |
| AT1G67590 | 8.14051 | 6.99132 | 2.217  | down |
| AT1G68180 | 2.59644 | 1.52786 | 2.097  | down |
| AT1G68320 | 4.12543 | 2.2857  | 3.579  | down |
| AT1G68350 | 2.81853 | 1.76601 | 2.074  | down |
| AT1G68568 | 8.81151 | 6.99724 | 3.516  | down |
| AT1G68570 | 9.68565 | 7.81925 | 3.646  | down |
| AT1G69540 | 3.61984 | 2.57373 | 2.064  | down |
| AT1G69797 | 1.27894 | 0.11098 | 2.246  | down |
| AT1G70080 | 2.65334 | 1.3403  | 2.484  | down |
| AT1G70720 | 4.78402 | 2.55583 | 4.685  | down |
| AT1G70920 | 4.39412 | 3.3449  | 2.069  | down |
| AT1G70940 | 7.50376 | 6.20828 | 2.454  | down |
| AT1G71120 | 2.74926 | 1.68575 | 2.090  | down |
| AT1G72110 | 2.03857 | 0.75146 | 2.440  | down |
| AT1G72200 | 2.42762 | 0.75962 | 3.177  | down |
| AT1G72920 | 4.12524 | 2.78073 | 2.539  | down |
| AT1G74045 | 2.07307 | 0.67876 | 2.628  | down |
| AT1G74110 | 3.11368 | 1.78064 | 2.519  | down |
| AT1G74670 | 8.90738 | 5.95356 | 7.747  | down |
| AT1G75610 | 2.32814 | 1.09437 | 2.351  | down |
| AT1G75770 | 5.11459 | 3.89624 | 2.326  | down |
| AT1G75880 | 8.60359 | 6.66455 | 3.834  | down |
| AT1G75890 | 5.20291 | 4.19734 | 2.007  | down |
| AT1G76480 | 1.38468 | 0.06913 | 2.488  | down |
| AT1G76930 | 4.19231 | 3.01475 | 2.261  | down |
| AT1G77200 | 7.31386 | 5.78383 | 2.887  | down |
| AT1G77450 | 7.32095 | 6.2692  | 2.073  | down |
| AT1G77855 | 6.04106 | 3.95872 | 4.234  | down |
| AT1G77870 | 5.31621 | 3.92538 | 2.622  | down |
| AT1G77880 | 4.75234 | 3.49254 | 2.394  | down |
| AT1G78450 | 4.82117 | 2.58007 | 4.727  | down |
| AT1G78970 | 7.22552 | 5.45807 | 3.404  | down |
| AT1G79430 | 1.38954 | 0.2928  | 2.138  | down |
| AT1G80050 | 8.36823 | 6.49171 | 3.671  | down |
| AT1G80540 | 7.43938 | 6.39052 | 2.068  | down |
| AT1G80580 | 2.00775 | 0.6018  | 2.649  | down |
| AT1G80730 | 3.46934 | 2.07825 | 2.622  | down |
| AT2G01200 | 4.9259  | 3.17918 | 3.355  | down |
| AT2G01420 | 7.711   | 4.18754 | 11.499 | down |

|           |         |         |             |
|-----------|---------|---------|-------------|
| AT2G02060 | 4.75499 | 3.73896 | 2.022 down  |
| AT2G03310 | 4.5276  | 3.4432  | 2.120 down  |
| AT2G03750 | 8.10099 | 6.99325 | 2.155 down  |
| AT2G03830 | 4.65333 | 2.82642 | 3.547 down  |
| AT2G03937 | 1.53638 | 0.05329 | 3.009 down  |
| AT2G04038 | 2.14545 | 1.04159 | 2.149 down  |
| AT2G04590 | 1.86814 | 0.12735 | 3.987 down  |
| AT2G05115 | 1.72453 | 0.48674 | 2.358 down  |
| AT2G05240 | 2.09956 | 0.17829 | 3.787 down  |
| AT2G05360 | 1.86835 | 0.40362 | 2.760 down  |
| AT2G05540 | 5.66696 | 4.32889 | 2.528 down  |
| AT2G06020 | 0.96865 | 0.31388 | 2.432 down  |
| AT2G06095 | 2.50025 | 1.4654  | 2.048 down  |
| AT2G06170 | 1.84162 | 0.67116 | 2.250 down  |
| AT2G06200 | 5.66204 | 3.35195 | 4.959 down  |
| AT2G06875 | 1.74624 | 0.43869 | 2.475 down  |
| AT2G07042 | 1.54867 | 0.35863 | 2.281 down  |
| AT2G07190 | 1.27354 | 0.24571 | 2.038 down  |
| AT2G10090 | 2.94269 | 1.31921 | 3.081 down  |
| AT2G10833 | 1.81061 | 0.38889 | 2.679 down  |
| AT2G11240 | 0.69679 | 0.31893 | 2.021 down  |
| AT2G11410 | 2.63258 | 1.56879 | 2.090 down  |
| AT2G12407 | 2.03817 | 0.68974 | 2.546 down  |
| AT2G14430 | 2.94749 | 1.57368 | 2.591 down  |
| AT2G15020 | 3.60354 | 2.43334 | 2.250 down  |
| AT2G15170 | 0.86948 | 0.22625 | 2.137 down  |
| AT2G16260 | 2.30855 | 0.87364 | 2.703 down  |
| AT2G16367 | 6.06246 | 4.22103 | 3.583 down  |
| AT2G16960 | 3.39624 | 1.53202 | 3.640 down  |
| AT2G17310 | 3.03901 | 1.83479 | 2.304 down  |
| AT2G17950 | 7.16749 | 5.87268 | 2.453 down  |
| AT2G18380 | 6.68493 | 5.30554 | 2.601 down  |
| AT2G18720 | 4.13247 | 3.09749 | 2.049 down  |
| AT2G18730 | 9.93993 | 8.85442 | 2.122 down  |
| AT2G19190 | 1.72425 | 0.65995 | 2.091 down  |
| AT2G20460 | 2.30803 | 1.02213 | 2.438 down  |
| AT2G20520 | 3.90284 | 2.64943 | 2.384 down  |
| AT2G21550 | 4.19935 | 3.00429 | 2.289 down  |
| AT2G22145 | 2.09955 | 0.96497 | 2.195 down  |
| AT2G22155 | 1.15759 | 0.01491 | 2.254 down  |
| AT2G22190 | 7.12145 | 5.90408 | 2.325 down  |
| AT2G23000 | 5.34484 | 1.83997 | 11.351 down |
| AT2G23060 | 8.39985 | 7.20183 | 2.294 down  |



|           |         |         |       |      |
|-----------|---------|---------|-------|------|
| AT2G23110 | 1.51671 | 0.4708  | 2.064 | down |
| AT2G23590 | 5.27898 | 3.92655 | 2.553 | down |
| AT2G23600 | 5.82373 | 4.60678 | 2.324 | down |
| AT2G25220 | 5.13124 | 3.96843 | 2.238 | down |
| AT2G25409 | 0.83196 | 0.42045 | 2.382 | down |
| AT2G25440 | 1.95827 | 0.84921 | 2.157 | down |
| AT2G25630 | 2.57588 | 0.88874 | 3.220 | down |
| AT2G26530 | 2.27227 | 0.72927 | 2.914 | down |
| AT2G27220 | 4.04108 | 1.70245 | 5.058 | down |
| AT2G27500 | 5.40347 | 4.3748  | 2.040 | down |
| AT2G27550 | 1.3727  | 0.35253 | 2.028 | down |
| AT2G28085 | 3.3723  | 1.33999 | 4.090 | down |
| AT2G28315 | 6.15565 | 5.07753 | 2.111 | down |
| AT2G28460 | 2.6147  | 1.21743 | 2.634 | down |
| AT2G29120 | 2.58502 | 1.01672 | 2.965 | down |
| AT2G29340 | 5.47731 | 3.39812 | 4.225 | down |
| AT2G29452 | 2.23258 | 0.00466 | 4.714 | down |
| AT2G30362 | 6.14777 | 4.91706 | 2.346 | down |
| AT2G30370 | 6.63942 | 5.42154 | 2.326 | down |
| AT2G30430 | 2.24977 | 1.21156 | 2.053 | down |
| AT2G30540 | 5.41577 | 3.22701 | 4.559 | down |
| AT2G31160 | 6.52287 | 5.35468 | 2.247 | down |
| AT2G32100 | 7.99208 | 6.41981 | 2.973 | down |
| AT2G32410 | 1.98725 | 0.35966 | 3.089 | down |
| AT2G32430 | 6.69302 | 5.57065 | 2.177 | down |
| AT2G33385 | 3.12534 | 1.84771 | 2.424 | down |
| AT2G33690 | 1.93242 | 0.58966 | 2.536 | down |
| AT2G34360 | 2.86123 | 1.69614 | 2.242 | down |
| AT2G34960 | 6.6404  | 5.34091 | 2.461 | down |
| AT2G35080 | 2.87692 | 1.81106 | 2.093 | down |
| AT2G36090 | 4.04018 | 2.50135 | 2.905 | down |
| AT2G36100 | 2.55837 | 1.01275 | 2.919 | down |
| AT2G36210 | 3.5152  | 1.95489 | 2.949 | down |
| AT2G36750 | 5.42587 | 3.07415 | 5.104 | down |
| AT2G36800 | 7.78674 | 6.07959 | 3.265 | down |
| AT2G37030 | 2.46947 | 1.46807 | 2.001 | down |
| AT2G37580 | 4.18982 | 2.72039 | 2.769 | down |
| AT2G38170 | 9.2686  | 7.62703 | 3.120 | down |
| AT2G38170 | 6.79925 | 4.75492 | 4.124 | down |
| AT2G39330 | 8.98518 | 6.36819 | 6.134 | down |
| AT2G39410 | 1.59121 | 0.43314 | 2.231 | down |
| AT2G39920 | 4.61398 | 2.26641 | 5.089 | down |
| AT2G39980 | 8.25575 | 7.12511 | 2.189 | down |

|           |         |         |            |
|-----------|---------|---------|------------|
| AT2G40200 | 2.26904 | 1.05088 | 2.326 down |
| AT2G40970 | 4.97744 | 3.96501 | 2.017 down |
| AT2G41510 | 6.97201 | 5.76473 | 2.309 down |
| AT2G42320 | 8.42989 | 7.35341 | 2.108 down |
| AT2G42485 | 2.77156 | 1.62318 | 2.216 down |
| AT2G43255 | 1.31509 | 0.11627 | 2.697 down |
| AT2G45180 | 7.9863  | 6.81298 | 2.255 down |
| AT2G45410 | 3.56064 | 1.12418 | 5.413 down |
| AT2G45570 | 1.88035 | 0.79495 | 2.121 down |
| AT2G46130 | 1.93143 | 0.52434 | 2.652 down |
| AT2G46640 | 1.69682 | 0.33792 | 2.564 down |
| AT2G47750 | 7.38891 | 6.38148 | 2.010 down |
| AT2G47870 | 2.23744 | 0.64913 | 3.006 down |
| AT2G48090 | 3.33015 | 2.2252  | 2.150 down |
| AT3G01750 | 7.36444 | 6.13048 | 2.352 down |
| AT3G01960 | 3.07351 | 1.4544  | 3.071 down |
| AT3G02500 | 3.64423 | 2.39341 | 2.379 down |
| AT3G02885 | 1.27353 | -0.1379 | 2.660 down |
| AT3G03240 | 1.08955 | 0.05755 | 2.044 down |
| AT3G04000 | 2.95586 | 1.56388 | 2.624 down |
| AT3G04200 | 0.95629 | 0.06033 | 2.023 down |
| AT3G04545 | 2.04497 | 1.00554 | 2.055 down |
| AT3G05160 | 6.88995 | 5.3891  | 2.830 down |
| AT3G05975 | 1.50182 | 0.20064 | 2.464 down |
| AT3G06370 | 4.5374  | 3.44193 | 2.136 down |
| AT3G07340 | 5.42049 | 3.04538 | 5.187 down |
| AT3G07620 | 2.64007 | 0.73668 | 3.740 down |
| AT3G10900 | 1.89356 | 0.8858  | 2.010 down |
| AT3G11580 | 6.89589 | 5.87235 | 2.032 down |
| AT3G11720 | 6.48151 | 5.11485 | 2.578 down |
| AT3G11860 | 2.69274 | 1.59656 | 2.137 down |
| AT3G11930 | 7.3841  | 5.89717 | 2.802 down |
| AT3G12720 | 2.12477 | 0.88006 | 2.369 down |
| AT3G12750 | 8.46766 | 7.27126 | 2.291 down |
| AT3G13600 | 7.34381 | 6.24438 | 2.142 down |
| AT3G13662 | 7.11023 | 5.8985  | 2.316 down |
| AT3G14025 | 3.27137 | 1.82153 | 2.731 down |
| AT3G14300 | 2.74664 | 1.61214 | 2.195 down |
| AT3G14500 | 2.83554 | 1.57291 | 2.399 down |
| AT3G15310 | 4.6023  | 2.36305 | 4.721 down |
| AT3G15870 | 5.56976 | 4.31427 | 2.387 down |
| AT3G16895 | 1.18242 | 0.05482 | 2.184 down |
| AT3G17130 | 2.94421 | 1.62924 | 2.487 down |

|           |         |         |             |
|-----------|---------|---------|-------------|
| AT3G17609 | 6.18194 | 4.85875 | 2.502 down  |
| AT3G18217 | 1.79061 | 0.68909 | 2.145 down  |
| AT3G18550 | 3.45064 | 1.96335 | 2.803 down  |
| AT3G21680 | 2.40211 | 0.95757 | 2.721 down  |
| AT3G22800 | 8.52445 | 7.08613 | 2.710 down  |
| AT3G23220 | 2.13472 | 0.72772 | 2.651 down  |
| AT3G23320 | 0.88834 | 0.14663 | 2.049 down  |
| AT3G23633 | 1.54392 | 0.43965 | 2.149 down  |
| AT3G23637 | 1.32712 | 0.27109 | 2.079 down  |
| AT3G24093 | 2.35987 | 0.51142 | 3.601 down  |
| AT3G24517 | 1.37142 | 0.26962 | 2.146 down  |
| AT3G24518 | 6.36931 | 4.35164 | 4.049 down  |
| AT3G25630 | 1.60602 | 0.43363 | 2.253 down  |
| AT3G25790 | 1.70836 | 0.1315  | 2.983 down  |
| AT3G26120 | 3.75332 | 0.72737 | 8.145 down  |
| AT3G26590 | 7.92728 | 5.37683 | 5.858 down  |
| AT3G26760 | 7.32501 | 5.75121 | 2.976 down  |
| AT3G26830 | 3.18479 | 2.17741 | 2.010 down  |
| AT3G26960 | 5.06645 | 2.75324 | 4.969 down  |
| AT3G27650 | 2.99767 | 1.36174 | 3.107 down  |
| AT3G27660 | 5.77528 | 3.87703 | 3.727 down  |
| AT3G28270 | 3.33325 | 0.93309 | 5.278 down  |
| AT3G28412 | 2.90988 | 1.86703 | 2.060 down  |
| AT3G28674 | 2.0237  | 0.48372 | 2.907 down  |
| AT3G28705 | 3.29289 | 2.07052 | 2.333 down  |
| AT3G28740 | 5.73559 | 3.33948 | 5.263 down  |
| AT3G28855 | 1.74327 | -0.0866 | 3.555 down  |
| AT3G28857 | 2.40898 | 0.75677 | 3.143 down  |
| AT3G29030 | 7.70992 | 4.26436 | 10.894 down |
| AT3G29150 | 2.53173 | 0.8505  | 3.207 down  |
| AT3G29790 | 1.58734 | 0.43368 | 2.224 down  |
| AT3G30844 | 1.18536 | 0.13904 | 2.065 down  |
| AT3G31720 | 0.64658 | 0.48709 | 2.194 down  |
| AT3G43430 | 3.70811 | 1.85517 | 3.612 down  |
| AT3G43546 | 1.15163 | 0.04208 | 2.287 down  |
| AT3G43622 | 2.55257 | 1.13113 | 2.678 down  |
| AT3G43867 | 2.22694 | 0.65581 | 2.971 down  |
| AT3G44230 | 3.22564 | 1.16495 | 4.171 down  |
| AT3G44605 | 0.99012 | 0.05945 | 2.069 down  |
| AT3G44935 | 1.39322 | 0.31757 | 2.107 down  |
| AT3G45200 | 1.28876 | 0.00404 | 2.450 down  |
| AT3G45710 | 4.10927 | 2.32896 | 3.435 down  |
| AT3G46130 | 3.26752 | 1.55347 | 3.280 down  |

|           |         |         |       |      |
|-----------|---------|---------|-------|------|
| AT3G46240 | 1.70616 | 0.11032 | 3.022 | down |
| AT3G46490 | 2.71267 | 0.66268 | 4.141 | down |
| AT3G46666 | 1.09387 | 0.08674 | 2.266 | down |
| AT3G46850 | 2.65146 | 1.62339 | 2.039 | down |
| AT3G47170 | 1.70572 | 0.67197 | 2.047 | down |
| AT3G47210 | 1.05469 | 0.01337 | 2.058 | down |
| AT3G47230 | 1.28384 | 0.16889 | 2.165 | down |
| AT3G47770 | 1.74731 | 0.51333 | 2.352 | down |
| AT3G48550 | 6.79389 | 4.91708 | 3.672 | down |
| AT3G49210 | 3.28245 | 1.26159 | 4.058 | down |
| AT3G50755 | 2.1923  | 0.47609 | 3.285 | down |
| AT3G50800 | 5.58841 | 4.10843 | 2.789 | down |
| AT3G50840 | 3.83305 | 2.67271 | 2.235 | down |
| AT3G51860 | 8.01604 | 6.37759 | 3.113 | down |
| AT3G51910 | 2.48346 | 1.26831 | 2.321 | down |
| AT3G52480 | 5.65125 | 3.33365 | 4.985 | down |
| AT3G52620 | 2.34491 | 0.45888 | 3.696 | down |
| AT3G53232 | 2.01625 | 0.98664 | 2.041 | down |
| AT3G53480 | 6.95946 | 5.5808  | 2.600 | down |
| AT3G53980 | 6.6033  | 5.14818 | 2.741 | down |
| AT3G55970 | 4.71698 | 3.41086 | 2.472 | down |
| AT3G56200 | 4.05857 | 2.90484 | 2.224 | down |
| AT3G56700 | 1.06651 | 0.04449 | 2.159 | down |
| AT3G57130 | 6.20163 | 4.55388 | 3.133 | down |
| AT3G57230 | 4.42837 | 3.32349 | 2.150 | down |
| AT3G58450 | 1.54868 | 0.39468 | 2.225 | down |
| AT3G58550 | 3.08598 | 1.6975  | 2.618 | down |
| AT3G59240 | 2.94811 | 1.26426 | 3.212 | down |
| AT3G60420 | 7.40739 | 6.20505 | 2.301 | down |
| AT3G60870 | 4.59641 | 3.27611 | 2.497 | down |
| AT3G61198 | 4.63115 | 2.14372 | 5.607 | down |
| AT3G61750 | 7.789   | 6.47691 | 2.483 | down |
| AT3G61940 | 3.09365 | 1.66401 | 2.693 | down |
| AT3G62610 | 5.14993 | 4.06019 | 2.128 | down |
| AT3G62690 | 7.17995 | 6.01061 | 2.249 | down |
| AT3G62740 | 4.70884 | 2.70885 | 3.999 | down |
| AT4G00050 | 2.87854 | 0.57857 | 4.924 | down |
| AT4G00165 | 8.05435 | 7.03434 | 2.027 | down |
| AT4G00210 | 4.56147 | 3.29654 | 2.403 | down |
| AT4G01140 | 2.86405 | 0.76602 | 4.281 | down |
| AT4G01340 | 1.38265 | 0.29778 | 2.121 | down |
| AT4G01460 | 7.63474 | 6.31969 | 2.488 | down |
| AT4G01500 | 8.07674 | 6.76187 | 2.487 | down |

|           |         |         |            |
|-----------|---------|---------|------------|
| AT4G01580 | 7.28234 | 6.26722 | 2.021 down |
| AT4G01915 | 3.10165 | 1.85884 | 2.366 down |
| AT4G02670 | 5.79631 | 3.97251 | 3.540 down |
| AT4G03270 | 6.94559 | 5.91835 | 2.038 down |
| AT4G03437 | 3.107   | 1.9471  | 2.234 down |
| AT4G03695 | 1.33397 | 0.30039 | 2.047 down |
| AT4G03913 | 1.78798 | -0.1809 | 3.914 down |
| AT4G03923 | 3.93022 | 2.2069  | 3.301 down |
| AT4G04404 | 3.22361 | 2.20514 | 2.025 down |
| AT4G04409 | 1.53713 | 0.2647  | 2.415 down |
| AT4G04750 | 7.38414 | 6.15725 | 2.340 down |
| AT4G06510 | 3.16264 | 1.97347 | 2.280 down |
| AT4G06644 | 2.0783  | 1.00455 | 2.104 down |
| AT4G06699 | 3.71353 | 2.25726 | 2.743 down |
| AT4G07310 | 2.61932 | 1.41524 | 2.303 down |
| AT4G07480 | 1.83023 | 0.42316 | 2.651 down |
| AT4G08028 | 1.29604 | 0.043   | 2.383 down |
| AT4G08076 | 1.66177 | 0.45651 | 2.305 down |
| AT4G08136 | 2.88665 | 1.8287  | 2.081 down |
| AT4G08264 | 1.37255 | 0.09066 | 2.757 down |
| AT4G08336 | 2.06555 | 0.91447 | 2.220 down |
| AT4G08351 | 2.20546 | 0.30904 | 3.722 down |
| AT4G08485 | 0.72971 | -0.3818 | 2.160 down |
| AT4G08645 | 1.31756 | 0.15002 | 2.246 down |
| AT4G09200 | 1.37098 | 0.12911 | 2.828 down |
| AT4G09940 | 3.99138 | 2.43077 | 2.949 down |
| AT4G10120 | 6.29845 | 4.9626  | 2.524 down |
| AT4G10201 | 0.77891 | 0.36463 | 2.209 down |
| AT4G10240 | 2.37238 | 0.65701 | 3.283 down |
| AT4G10430 | 2.60774 | 1.52143 | 2.123 down |
| AT4G10500 | 2.67686 | 1.29606 | 2.604 down |
| AT4G11460 | 4.00716 | 2.62513 | 2.606 down |
| AT4G11610 | 2.21675 | 1.19254 | 2.033 down |
| AT4G11945 | 1.37109 | 0.18959 | 2.268 down |
| AT4G12580 | 4.19256 | 2.53855 | 3.147 down |
| AT4G13210 | 4.16872 | 3.01642 | 2.222 down |
| AT4G13410 | 6.29816 | 4.06189 | 4.711 down |
| AT4G13760 | 1.47398 | 0.09719 | 2.596 down |
| AT4G14130 | 8.13412 | 6.4583  | 3.195 down |
| AT4G14251 | 2.89666 | 0.41944 | 5.568 down |
| AT4G14580 | 2.53159 | 1.46203 | 2.098 down |
| AT4G14980 | 2.94653 | 1.83005 | 2.168 down |
| AT4G15060 | 2.48541 | 1.25274 | 2.350 down |

|           |         |         |             |
|-----------|---------|---------|-------------|
| AT4G15075 | 1.65738 | 0.32163 | 2.524 down  |
| AT4G15160 | 8.95475 | 7.6064  | 2.546 down  |
| AT4G15733 | 1.0717  | 0.01249 | 2.120 down  |
| AT4G15760 | 7.61003 | 6.43908 | 2.251 down  |
| AT4G17250 | 2.87642 | 1.66611 | 2.313 down  |
| AT4G17810 | 5.46649 | 3.07636 | 5.242 down  |
| AT4G18000 | 0.86147 | 0.23055 | 2.131 down  |
| AT4G18197 | 4.57844 | 3.52342 | 2.077 down  |
| AT4G18410 | 1.41645 | 0.14452 | 2.414 down  |
| AT4G18540 | 3.30126 | 1.39836 | 3.739 down  |
| AT4G18620 | 1.58416 | 0.39993 | 2.272 down  |
| AT4G19170 | 6.45564 | 5.12955 | 2.507 down  |
| AT4G19380 | 7.35102 | 3.63985 | 13.097 down |
| AT4G19430 | 7.4073  | 4.69691 | 6.544 down  |
| AT4G19770 | 2.35874 | 0.55412 | 3.493 down  |
| AT4G21500 | 3.87832 | 2.8594  | 2.026 down  |
| AT4G21930 | 6.96428 | 5.91652 | 2.067 down  |
| AT4G24275 | 0.81777 | 0.34196 | 2.234 down  |
| AT4G24670 | 5.3471  | 4.34155 | 2.007 down  |
| AT4G25434 | 2.51484 | 1.3485  | 2.244 down  |
| AT4G25760 | 6.37281 | 4.07546 | 4.915 down  |
| AT4G26055 | 3.99759 | 1.71171 | 4.876 down  |
| AT4G26420 | 0.97548 | 0.20804 | 2.271 down  |
| AT4G27260 | 9.7946  | 8.78555 | 2.012 down  |
| AT4G27330 | 8.35357 | 7.06905 | 2.436 down  |
| AT4G27590 | 1.41303 | 0.36698 | 2.064 down  |
| AT4G27657 | 3.64734 | 1.77451 | 3.662 down  |
| AT4G28460 | 5.25684 | 3.96794 | 2.443 down  |
| AT4G28850 | 1.62071 | 0.08508 | 3.262 down  |
| AT4G29033 | 0.80255 | 0.63118 | 2.701 down  |
| AT4G29210 | 3.49788 | 2.34345 | 2.225 down  |
| AT4G29340 | 5.99293 | 4.89214 | 2.144 down  |
| AT4G31620 | 5.37989 | 2.85897 | 5.739 down  |
| AT4G31630 | 2.58379 | 1.37052 | 2.318 down  |
| AT4G31730 | 4.71488 | 3.40942 | 2.471 down  |
| AT4G32540 | 6.80192 | 5.39371 | 2.654 down  |
| AT4G32924 | 1.99396 | 0.7758  | 2.326 down  |
| AT4G32950 | 6.09141 | 4.97002 | 2.175 down  |
| AT4G33550 | 2.5228  | 0.88429 | 3.113 down  |
| AT4G33585 | 3.67773 | 2.61154 | 2.093 down  |
| AT4G33960 | 3.98201 | 2.7189  | 2.400 down  |
| AT4G34930 | 1.1121  | 0.05673 | 2.248 down  |
| AT4G34940 | 5.70313 | 4.40185 | 2.464 down  |

|           |          |         |            |
|-----------|----------|---------|------------|
| AT4G35295 | 2.62584  | 1.05292 | 2.975 down |
| AT4G36510 | 1.74994  | 0.66905 | 2.115 down |
| AT4G37140 | 4.56946  | 1.6748  | 7.436 down |
| AT4G37310 | 5.96998  | 4.27038 | 3.248 down |
| AT4G37320 | 5.63843  | 3.5668  | 4.203 down |
| AT4G37520 | 3.4094   | 0.77943 | 6.190 down |
| AT4G37530 | 6.83179  | 4.3668  | 5.521 down |
| AT4G37610 | 5.58167  | 4.53951 | 2.059 down |
| AT4G37840 | 1.3455   | 0.08586 | 2.394 down |
| AT4G37970 | 2.16092  | 0.31401 | 3.597 down |
| AT4G38340 | 5.12134  | 3.97875 | 2.207 down |
| AT4G38860 | 6.09513  | 4.19234 | 3.739 down |
| AT4G39320 | 2.13483  | 1.05525 | 2.113 down |
| AT4G39640 | 6.64855  | 4.96527 | 3.211 down |
| AT5G01840 | 6.74179  | 5.57626 | 2.243 down |
| AT5G02190 | 8.78428  | 7.48456 | 2.461 down |
| AT5G02750 | 6.2967   | 5.24145 | 2.078 down |
| AT5G02780 | 2.22614  | 0.59723 | 3.092 down |
| AT5G03510 | 4.14451  | 2.98651 | 2.231 down |
| AT5G03700 | 4.62701  | 1.81362 | 7.029 down |
| AT5G03790 | 6.07813  | 4.17317 | 3.745 down |
| AT5G04030 | 0.97627  | 0.12287 | 2.142 down |
| AT5G04490 | 7.40392  | 6.12436 | 2.427 down |
| AT5G06278 | 3.05923  | 1.74909 | 2.479 down |
| AT5G06800 | 2.90839  | 1.25068 | 3.155 down |
| AT5G06865 | 6.74903  | 5.19622 | 2.933 down |
| AT5G06870 | 8.1799   | 6.28524 | 3.718 down |
| AT5G07500 | 4.13537  | 3.00105 | 2.195 down |
| AT5G07580 | 6.51328  | 5.21271 | 2.463 down |
| AT5G07990 | 10.52827 | 9.46204 | 2.093 down |
| AT5G08460 | 5.4542   | 4.31597 | 2.201 down |
| AT5G08760 | 2.67824  | 1.54686 | 2.190 down |
| AT5G09700 | 1.21813  | 0.29294 | 2.850 down |
| AT5G09820 | 4.17575  | 3.14741 | 2.039 down |
| AT5G10100 | 4.89961  | 3.4096  | 2.808 down |
| AT5G10140 | 0.7622   | 0.39824 | 2.235 down |
| AT5G10250 | 3.74923  | 2.06849 | 3.205 down |
| AT5G10300 | 6.68213  | 4.62168 | 4.171 down |
| AT5G10310 | 7.64903  | 6.31896 | 2.514 down |
| AT5G11320 | 6.28895  | 5.1269  | 2.237 down |
| AT5G11425 | 2.08927  | 0.77226 | 2.491 down |
| AT5G11830 | 2.08699  | 0.74492 | 2.535 down |
| AT5G12060 | 1.56772  | 0.00642 | 2.977 down |

|           |         |         |            |
|-----------|---------|---------|------------|
| AT5G12450 | 1.53755 | 0.50235 | 2.049 down |
| AT5G12460 | 2.98499 | 1.79461 | 2.282 down |
| AT5G13370 | 2.81705 | 1.17714 | 3.116 down |
| AT5G14545 | 1.63305 | 0.00192 | 3.097 down |
| AT5G14565 | 8.89892 | 7.64096 | 2.391 down |
| AT5G14570 | 8.26413 | 7.0218  | 2.365 down |
| AT5G15160 | 4.71766 | 1.87267 | 7.185 down |
| AT5G15265 | 1.2231  | 0.11369 | 2.525 down |
| AT5G15840 | 6.24689 | 5.23069 | 2.022 down |
| AT5G16080 | 5.21884 | 3.48206 | 3.332 down |
| AT5G16140 | 0.82992 | 0.20987 | 2.055 down |
| AT5G16190 | 7.31215 | 5.61896 | 3.233 down |
| AT5G16235 | 6.64862 | 5.21593 | 2.699 down |
| AT5G17180 | 2.39876 | 0.62795 | 3.412 down |
| AT5G17590 | 6.02787 | 4.83075 | 2.292 down |
| AT5G17720 | 1.22021 | 0.16467 | 2.078 down |
| AT5G19110 | 3.20357 | 1.81177 | 2.624 down |
| AT5G20260 | 2.12405 | 0.47447 | 3.137 down |
| AT5G20670 | 7.31001 | 5.99104 | 2.494 down |
| AT5G20800 | 0.75786 | 0.52311 | 2.430 down |
| AT5G20940 | 8.16894 | 6.47634 | 3.232 down |
| AT5G22300 | 4.73572 | 2.94029 | 3.471 down |
| AT5G22460 | 1.46976 | 0.0811  | 2.618 down |
| AT5G22545 | 1.26837 | 0.11381 | 2.606 down |
| AT5G22900 | 3.12874 | 1.08806 | 4.114 down |
| AT5G23100 | 7.74544 | 6.71419 | 2.043 down |
| AT5G24190 | 2.43093 | 1.1853  | 2.371 down |
| AT5G24370 | 3.41706 | 1.59067 | 3.546 down |
| AT5G25390 | 6.97457 | 5.50243 | 2.774 down |
| AT5G25810 | 4.48715 | 2.95751 | 2.887 down |
| AT5G26010 | 0.7259  | 0.59292 | 2.494 down |
| AT5G27130 | 1.76261 | 0.09292 | 3.181 down |
| AT5G28143 | 1.10438 | 0.07244 | 2.260 down |
| AT5G28886 | 1.90532 | 0.41021 | 2.818 down |
| AT5G28920 | 1.82482 | 0.18537 | 3.115 down |
| AT5G29000 | 1.70471 | 0.50482 | 2.297 down |
| AT5G29436 | 2.7143  | 1.42643 | 2.441 down |
| AT5G30500 | 3.65087 | 2.15479 | 2.820 down |
| AT5G31412 | 1.2942  | 0.05373 | 2.545 down |
| AT5G32436 | 3.33497 | 0.77853 | 5.882 down |
| AT5G32520 | 3.94528 | 2.73029 | 2.321 down |
| AT5G33303 | 3.91984 | 2.36798 | 2.931 down |
| AT5G33350 | 2.94386 | 1.58249 | 2.569 down |



|           |         |         |             |
|-----------|---------|---------|-------------|
| AT5G34825 | 3.72834 | 1.88403 | 3.590 down  |
| AT5G35230 | 1.46376 | 0.3935  | 2.099 down  |
| AT5G35480 | 2.58936 | 0.67813 | 3.761 down  |
| AT5G35601 | 2.9777  | 1.38372 | 3.018 down  |
| AT5G35777 | 1.27723 | 0.25565 | 2.893 down  |
| AT5G36140 | 3.18763 | 1.68883 | 2.826 down  |
| AT5G36960 | 4.13075 | 2.26455 | 3.645 down  |
| AT5G37620 | 1.84219 | 0.0956  | 3.355 down  |
| AT5G37800 | 2.43096 | 1.06044 | 2.585 down  |
| AT5G37860 | 7.26495 | 5.57693 | 3.222 down  |
| AT5G38270 | 1.3582  | 0.11521 | 2.366 down  |
| AT5G38435 | 2.09141 | 0.55134 | 2.908 down  |
| AT5G38940 | 2.13285 | 0.31742 | 3.519 down  |
| AT5G38960 | 2.35696 | 0.93933 | 2.671 down  |
| AT5G39190 | 3.15809 | 1.97758 | 2.266 down  |
| AT5G39245 | 1.38888 | -0.2001 | 3.008 down  |
| AT5G39860 | 4.69884 | 3.66041 | 2.053 down  |
| AT5G40210 | 4.09493 | 2.30507 | 3.457 down  |
| AT5G40540 | 6.82345 | 5.75238 | 2.100 down  |
| AT5G40800 | 3.79527 | 2.76081 | 2.048 down  |
| AT5G40990 | 1.5376  | 0.53585 | 4.208 down  |
| AT5G41050 | 6.44404 | 4.20377 | 4.724 down  |
| AT5G41510 | 5.51748 | 3.61919 | 3.727 down  |
| AT5G42650 | 5.71311 | 4.51067 | 2.301 down  |
| AT5G42860 | 7.03312 | 5.90787 | 2.181 down  |
| AT5G43513 | 3.55514 | 1.85974 | 3.238 down  |
| AT5G44210 | 4.87695 | 3.3124  | 2.957 down  |
| AT5G44390 | 2.82089 | 1.36903 | 2.735 down  |
| AT5G44430 | 1.54166 | 0.21366 | 2.510 down  |
| AT5G45220 | 2.3464  | 0.31457 | 4.089 down  |
| AT5G45350 | 4.75344 | 3.58798 | 2.243 down  |
| AT5G45490 | 3.96015 | 2.10574 | 3.616 down  |
| AT5G46500 | 2.35939 | 0.89335 | 2.762 down  |
| AT5G46810 | 0.90847 | 0.28385 | 2.285 down  |
| AT5G46830 | 4.10679 | 2.5863  | 2.868 down  |
| AT5G47610 | 7.53078 | 6.21944 | 2.481 down  |
| AT5G48375 | 2.7006  | 0.38662 | 4.972 down  |
| AT5G48950 | 4.48176 | 3.31845 | 2.239 down  |
| AT5G49435 | 4.57582 | 3.47149 | 2.149 down  |
| AT5G49448 | 6.56832 | 5.53762 | 2.043 down  |
| AT5G49690 | 1.9455  | 0.94253 | 2.004 down  |
| AT5G49730 | 7.90781 | 4.51459 | 10.506 down |
| AT5G49740 | 7.45293 | 6.33288 | 2.173 down  |

|           |         |         |             |
|-----------|---------|---------|-------------|
| AT5G49770 | 5.65201 | 2.59417 | 8.327 down  |
| AT5G50050 | 1.48376 | 0.09846 | 2.612 down  |
| AT5G50115 | 3.09337 | 1.96027 | 2.193 down  |
| AT5G50423 | 0.86873 | 0.17812 | 2.066 down  |
| AT5G50740 | 8.53125 | 7.24219 | 2.443 down  |
| AT5G50770 | 2.28638 | 0.56559 | 3.296 down  |
| AT5G51670 | 5.87426 | 4.72382 | 2.219 down  |
| AT5G51850 | 7.82698 | 6.54002 | 2.440 down  |
| AT5G52320 | 7.13095 | 5.57941 | 2.931 down  |
| AT5G52390 | 8.43172 | 7.17024 | 2.397 down  |
| AT5G52610 | 2.2169  | 0.99679 | 2.329 down  |
| AT5G53200 | 8.05009 | 5.85099 | 4.591 down  |
| AT5G53486 | 6.00389 | 4.9711  | 2.045 down  |
| AT5G53660 | 8.78803 | 5.25068 | 11.610 down |
| AT5G54190 | 1.60019 | 0.07259 | 2.883 down  |
| AT5G54250 | 9.35264 | 7.96975 | 2.607 down  |
| AT5G54410 | 1.91402 | 0.36937 | 2.917 down  |
| AT5G55110 | 2.39512 | 1.21081 | 2.272 down  |
| AT5G55855 | 2.28888 | 0.84369 | 2.722 down  |
| AT5G56220 | 8.65021 | 7.4481  | 2.300 down  |
| AT5G56720 | 5.60552 | 4.53414 | 2.101 down  |
| AT5G56970 | 6.33592 | 5.19702 | 2.202 down  |
| AT5G57550 | 2.452   | 1.00148 | 2.733 down  |
| AT5G58465 | 2.65172 | 0.35398 | 4.916 down  |
| AT5G59080 | 4.00168 | 1.34462 | 6.307 down  |
| AT5G59130 | 5.91343 | 3.93346 | 3.944 down  |
| AT5G59310 | 7.20441 | 5.66739 | 2.901 down  |
| AT5G59320 | 6.71984 | 4.64943 | 4.200 down  |
| AT5G60630 | 3.68833 | 2.47082 | 2.325 down  |
| AT5G61490 | 3.19179 | 1.98289 | 2.311 down  |
| AT5G61520 | 6.53334 | 5.50458 | 2.040 down  |
| AT5G62280 | 6.31989 | 4.72547 | 3.019 down  |
| AT5G62480 | 2.40033 | 1.01643 | 2.609 down  |
| AT5G62510 | 6.0268  | 4.77919 | 2.374 down  |
| AT5G63140 | 6.75187 | 4.86294 | 3.703 down  |
| AT5G63660 | 5.1913  | 3.22302 | 3.913 down  |
| AT5G65040 | 5.07929 | 2.88483 | 4.577 down  |
| AT5G65070 | 3.0911  | 1.69444 | 2.632 down  |
| AT5G65166 | 1.23884 | 0.15987 | 2.636 down  |
| AT5G65730 | 9.2657  | 7.52733 | 3.336 down  |
| AT5G66040 | 5.62066 | 4.44481 | 2.259 down  |
| AT5G66400 | 6.2131  | 4.49428 | 3.291 down  |
| AT5G66400 | 6.0607  | 4.50633 | 2.937 down  |

|           |          |         |            |
|-----------|----------|---------|------------|
| AT5G66815 | 1.32587  | 0.19414 | 2.191 down |
| AT1G01060 | -0.31121 | 1.29102 | 3.036 up   |
| AT1G01183 | 0.87912  | 2.26136 | 2.606 up   |
| AT1G03850 | 6.06901  | 7.08814 | 2.026 up   |
| AT1G04171 | 4.73265  | 6.07898 | 2.542 up   |
| AT1G04250 | 5.68312  | 7.08912 | 2.650 up   |
| AT1G04500 | 0.7333   | 2.42823 | 3.237 up   |
| AT1G08105 | 4.25611  | 5.53429 | 2.425 up   |
| AT1G11112 | 1.01911  | 2.56853 | 2.926 up   |
| AT1G12130 | 0.5327   | 1.54048 | 2.010 up   |
| AT1G12210 | 4.02223  | 5.37196 | 2.548 up   |
| AT1G12940 | 2.9823   | 4.30585 | 2.502 up   |
| AT1G13110 | 2.84351  | 4.42721 | 2.997 up   |
| AT1G14960 | 0.82134  | 2.33284 | 2.851 up   |
| AT1G15015 | 0.70032  | 2.12764 | 2.689 up   |
| AT1G15430 | 0.40715  | 2.57014 | 4.478 up   |
| AT1G17545 | 2.45821  | 3.50455 | 2.065 up   |
| AT1G17710 | 0.03824  | 1.15373 | 2.166 up   |
| AT1G27160 | 0.80874  | 1.87071 | 2.087 up   |
| AT1G28170 | 0.4022   | 1.46621 | 2.090 up   |
| AT1G28455 | 1.72472  | 2.73356 | 2.012 up   |
| AT1G28570 | 3.00854  | 4.40655 | 2.635 up   |
| AT1G29790 | 2.20501  | 3.48629 | 2.430 up   |
| AT1G30784 | 3.07804  | 4.09722 | 2.026 up   |
| AT1G32840 | 3.62556  | 4.76748 | 2.206 up   |
| AT1G35186 | -0.23478 | 1.12905 | 2.573 up   |
| AT1G35710 | 3.44411  | 4.69885 | 2.386 up   |
| AT1G36078 | 0.18653  | 2.04559 | 3.627 up   |
| AT1G36190 | 0.88368  | 2.32723 | 2.719 up   |
| AT1G36550 | 1.90716  | 3.23727 | 2.514 up   |
| AT1G36840 | 1.56542  | 2.72347 | 2.231 up   |
| AT1G37063 | 3.26922  | 4.57487 | 2.471 up   |
| AT1G38203 | 2.959    | 4.36032 | 2.641 up   |
| AT1G38270 | 1.9454   | 3.32231 | 2.597 up   |
| AT1G38416 | 1.15514  | 2.611   | 2.743 up   |
| AT1G38790 | 0.26115  | 1.31514 | 2.076 up   |
| AT1G40095 | 3.38423  | 4.45498 | 2.100 up   |
| AT1G40119 | 4.17086  | 5.20173 | 2.043 up   |
| AT1G40135 | 5.45066  | 6.50303 | 2.073 up   |
| AT1G41710 | 3.69519  | 4.94096 | 2.371 up   |
| AT1G41720 | 5.36885  | 6.39586 | 2.037 up   |
| AT1G41795 | 1.49598  | 2.75534 | 2.393 up   |
| AT1G42320 | 3.48273  | 4.618   | 2.196 up   |

|           |          |         |          |
|-----------|----------|---------|----------|
| AT1G42695 | 1.33023  | 2.83015 | 2.828 up |
| AT1G43230 | 1.94304  | 3.86303 | 3.784 up |
| AT1G43667 | 0.19085  | 1.33013 | 2.202 up |
| AT1G43755 | 4.36363  | 5.5918  | 2.342 up |
| AT1G43950 | -0.09172 | 1.16894 | 2.396 up |
| AT1G44010 | -0.21285 | 1.42915 | 3.120 up |
| AT1G44080 | 0.69677  | 1.92866 | 2.348 up |
| AT1G44840 | 0.49762  | 2.07966 | 2.993 up |
| AT1G48690 | 0.75958  | 1.79442 | 2.048 up |
| AT1G49570 | 0.86761  | 1.94888 | 2.115 up |
| AT1G50280 | 2.78938  | 4.54504 | 3.376 up |
| AT1G50760 | 1.08891  | 2.65744 | 2.966 up |
| AT1G51210 | 3.36303  | 4.88703 | 2.875 up |
| AT1G51823 | 0.34442  | 1.64073 | 2.456 up |
| AT1G51850 | 0.97309  | 1.98752 | 2.020 up |
| AT1G51915 | 0.54459  | 1.59177 | 2.066 up |
| AT1G52087 | 0.87445  | 2.02692 | 2.222 up |
| AT1G52240 | 0.95161  | 2.59102 | 3.115 up |
| AT1G52770 | 4.18965  | 5.89726 | 3.266 up |
| AT1G52960 | 3.23584  | 4.87522 | 3.115 up |
| AT1G53366 | -0.0895  | 1.93799 | 4.076 up |
| AT1G53870 | 0.18792  | 1.25354 | 2.093 up |
| AT1G54430 | 1.09094  | 2.7422  | 3.141 up |
| AT1G55290 | 1.98011  | 3.53706 | 2.942 up |
| AT1G55720 | 1.60746  | 2.91302 | 2.471 up |
| AT1G55964 | 0.3333   | 1.64618 | 2.484 up |
| AT1G61800 | 6.93022  | 8.23542 | 2.471 up |
| AT1G62510 | 4.75786  | 5.92329 | 2.243 up |
| AT1G62530 | -0.31253 | 1.41177 | 3.304 up |
| AT1G62920 | 2.84284  | 4.10515 | 2.398 up |
| AT1G63580 | 0.23486  | 1.72741 | 2.813 up |
| AT1G64380 | 4.923    | 6.91402 | 3.975 up |
| AT1G65620 | 4.1258   | 5.16024 | 2.048 up |
| AT1G66145 | 0.38388  | 1.55227 | 2.247 up |
| AT1G66990 | 5.16709  | 6.20972 | 2.059 up |
| AT1G67195 | 0.87053  | 2.8058  | 3.824 up |
| AT1G68040 | 1.77917  | 3.11777 | 2.529 up |
| AT1G68860 | 2.65374  | 4.0085  | 2.557 up |
| AT1G68935 | 4.00876  | 5.1253  | 2.168 up |
| AT1G70500 | 2.43548  | 3.71353 | 2.425 up |
| AT1G75080 | 0.68557  | 2.14094 | 2.742 up |
| AT1G76420 | 7.5197   | 8.56963 | 2.070 up |
| AT1G78330 | 1.26224  | 2.82712 | 2.958 up |

|           |          |         |          |
|-----------|----------|---------|----------|
| AT2G01360 | 1.6227   | 2.67018 | 2.066 up |
| AT2G01800 | 2.0063   | 3.29065 | 2.435 up |
| AT2G01890 | 5.62419  | 6.64093 | 2.023 up |
| AT2G03110 | 4.49134  | 5.7287  | 2.357 up |
| AT2G03250 | 1.13025  | 2.40816 | 2.424 up |
| AT2G04170 | 1.99403  | 3.18661 | 2.285 up |
| AT2G04180 | 0.82421  | 1.86805 | 2.061 up |
| AT2G05020 | 0.24781  | 1.41313 | 2.242 up |
| AT2G05040 | 1.39239  | 2.71482 | 2.500 up |
| AT2G05185 | 4.1568   | 5.34582 | 2.279 up |
| AT2G05680 | 0.63541  | 2.34514 | 3.270 up |
| AT2G05740 | -0.09137 | 1.09708 | 2.279 up |
| AT2G06330 | 3.97165  | 5.06352 | 2.131 up |
| AT2G06800 | 1.23357  | 2.72456 | 2.810 up |
| AT2G06917 | 3.57134  | 4.76588 | 2.288 up |
| AT2G07110 | 0.19334  | 1.69824 | 2.838 up |
| AT2G07395 | 3.50107  | 4.55668 | 2.078 up |
| AT2G07430 | 1.51588  | 2.72744 | 2.315 up |
| AT2G07510 | 0.51385  | 2.27279 | 3.384 up |
| AT2G09795 | 0.45598  | 1.68709 | 2.347 up |
| AT2G10070 | 1.29896  | 2.78625 | 2.803 up |
| AT2G10105 | 1.70125  | 2.79938 | 2.140 up |
| AT2G10140 | 3.2795   | 4.41546 | 2.197 up |
| AT2G10220 | 1.58554  | 3.37881 | 3.465 up |
| AT2G10730 | 1.92564  | 3.14341 | 2.325 up |
| AT2G10990 | 0.36931  | 1.84966 | 2.790 up |
| AT2G11230 | 2.84206  | 4.10551 | 2.400 up |
| AT2G11360 | 0.53364  | 1.70105 | 2.246 up |
| AT2G11530 | 1.18906  | 3.03711 | 3.600 up |
| AT2G11852 | 1.71949  | 2.97538 | 2.388 up |
| AT2G12250 | 1.24637  | 2.5848  | 2.528 up |
| AT2G12325 | -0.07346 | 1.00628 | 2.113 up |
| AT2G12390 | 1.91753  | 2.92557 | 2.011 up |
| AT2G12557 | 1.96753  | 3.2576  | 2.445 up |
| AT2G12820 | 0.03575  | 1.84006 | 3.492 up |
| AT2G13870 | 2.5241   | 4.18011 | 3.151 up |
| AT2G14030 | 0.9247   | 2.01566 | 2.130 up |
| AT2G14690 | 1.84281  | 3.01281 | 2.250 up |
| AT2G15190 | 3.94224  | 4.99387 | 2.072 up |
| AT2G15765 | 0.77816  | 1.80141 | 2.032 up |
| AT2G16100 | 1.39257  | 2.448   | 2.078 up |
| AT2G16610 | 0.29793  | 1.49985 | 2.300 up |
| AT2G16930 | 0.77579  | 2.64641 | 3.656 up |

|           |          |         |          |
|-----------|----------|---------|----------|
| AT2G17470 | 2.72866  | 3.92483 | 2.291 up |
| AT2G18030 | 2.54934  | 3.98802 | 2.710 up |
| AT2G18530 | 1.31734  | 2.47462 | 2.230 up |
| AT2G18870 | 1.20837  | 2.3044  | 2.137 up |
| AT2G20350 | 0.99612  | 2.40541 | 2.656 up |
| AT2G21650 | 3.08994  | 4.53597 | 2.724 up |
| AT2G22040 | 1.2768   | 2.28496 | 2.011 up |
| AT2G22860 | 0.82751  | 2.15537 | 2.510 up |
| AT2G23100 | 1.62867  | 3.11948 | 2.810 up |
| AT2G23570 | 1.90267  | 3.16387 | 2.396 up |
| AT2G24120 | 2.08358  | 3.23768 | 2.225 up |
| AT2G24160 | 3.69863  | 4.90567 | 2.308 up |
| AT2G25565 | 2.09005  | 3.28077 | 2.282 up |
| AT2G25710 | 2.05572  | 3.37706 | 2.498 up |
| AT2G27270 | 0.02576  | 1.2673  | 2.364 up |
| AT2G27700 | 2.9897   | 4.05699 | 2.095 up |
| AT2G27710 | 0.71036  | 2.47263 | 3.392 up |
| AT2G28170 | 1.51108  | 2.70699 | 2.290 up |
| AT2G29220 | 0.97635  | 2.81247 | 3.570 up |
| AT2G29670 | 5.65658  | 7.03258 | 2.595 up |
| AT2G31082 | -0.11143 | 1.10816 | 2.328 up |
| AT2G31345 | 0.0061   | 1.26861 | 2.399 up |
| AT2G32487 | 0.01373  | 1.03499 | 2.029 up |
| AT2G32530 | 5.45613  | 7.32885 | 3.662 up |
| AT2G33310 | 1.78693  | 3.22232 | 2.704 up |
| AT2G33480 | 4.21517  | 5.7319  | 2.861 up |
| AT2G34820 | 1.32885  | 2.48216 | 2.224 up |
| AT2G35387 | 5.91396  | 6.93778 | 2.033 up |
| AT2G35637 | 2.18518  | 3.24993 | 2.091 up |
| AT2G36940 | 5.99565  | 7.11849 | 2.177 up |
| AT2G39370 | 0.3962   | 2.19958 | 3.490 up |
| AT2G41090 | 7.36125  | 8.50772 | 2.213 up |
| AT2G41312 | 0.43069  | 1.59659 | 2.243 up |
| AT2G42660 | 3.32395  | 4.55335 | 2.344 up |
| AT2G43670 | 1.86722  | 3.05988 | 2.285 up |
| AT2G44840 | 3.74696  | 4.76371 | 2.023 up |
| AT2G45406 | 2.72145  | 4.08132 | 2.566 up |
| AT3G04390 | 1.01856  | 2.18936 | 2.251 up |
| AT3G04943 | 0.36417  | 1.50284 | 2.201 up |
| AT3G05300 | 1.66498  | 3.12826 | 2.757 up |
| AT3G05650 | 4.96775  | 6.11582 | 2.216 up |
| AT3G09585 | 0.97576  | 2.04518 | 2.098 up |
| AT3G12835 | 1.75174  | 3.06152 | 2.479 up |

|           |         |         |          |
|-----------|---------|---------|----------|
| AT3G13630 | 0.47942 | 1.50733 | 2.039 up |
| AT3G16210 | 0.89517 | 2.11777 | 2.333 up |
| AT3G16690 | 0.32141 | 1.33339 | 2.016 up |
| AT3G17190 | 1.72595 | 2.85069 | 2.180 up |
| AT3G21965 | 0.55749 | 2.36499 | 3.500 up |
| AT3G22580 | 1.14143 | 2.48586 | 2.539 up |
| AT3G22930 | 1.38017 | 2.65803 | 2.424 up |
| AT3G24310 | 3.01355 | 4.05336 | 2.055 up |
| AT3G24380 | 1.73914 | 2.83793 | 2.141 up |
| AT3G25440 | 0.5092  | 1.79078 | 2.431 up |
| AT3G26020 | 1.61987 | 2.89994 | 2.428 up |
| AT3G26270 | -0.0188 | 1.16243 | 2.267 up |
| AT3G26620 | 1.18449 | 2.51581 | 2.516 up |
| AT3G26742 | 1.60521 | 3.4333  | 3.550 up |
| AT3G28155 | 2.54532 | 3.7294  | 2.272 up |
| AT3G29270 | 3.5515  | 4.55867 | 2.009 up |
| AT3G29641 | 1.81392 | 3.05979 | 2.371 up |
| AT3G29650 | 3.55035 | 5.15669 | 3.044 up |
| AT3G30383 | 1.83587 | 2.88529 | 2.069 up |
| AT3G30505 | 2.26149 | 3.45108 | 2.280 up |
| AT3G30740 | 4.41015 | 5.50562 | 2.136 up |
| AT3G30769 | 1.91612 | 3.30622 | 2.620 up |
| AT3G30816 | 5.26539 | 6.34581 | 2.114 up |
| AT3G30830 | 1.28737 | 3.15371 | 3.646 up |
| AT3G31310 | 0.24649 | 1.63217 | 2.612 up |
| AT3G31314 | 2.17217 | 3.35547 | 2.270 up |
| AT3G31359 | 1.8211  | 3.68501 | 3.639 up |
| AT3G31367 | 3.59959 | 4.68558 | 2.122 up |
| AT3G31380 | 0.80405 | 2.05246 | 2.375 up |
| AT3G31996 | 2.13034 | 3.47677 | 2.542 up |
| AT3G32040 | 1.83706 | 2.91577 | 2.112 up |
| AT3G32047 | 0.1657  | 1.42481 | 2.393 up |
| AT3G32373 | 1.723   | 2.92415 | 2.299 up |
| AT3G32902 | 2.00083 | 3.56356 | 2.954 up |
| AT3G33148 | 1.53362 | 2.75087 | 2.325 up |
| AT3G33154 | 0.22966 | 1.30659 | 2.109 up |
| AT3G33565 | 0.94952 | 2.32617 | 2.596 up |
| AT3G42340 | 0.27507 | 1.73933 | 2.759 up |
| AT3G42478 | 3.16029 | 4.18455 | 2.033 up |
| AT3G42520 | 2.04616 | 3.26197 | 2.322 up |
| AT3G42590 | 2.9834  | 4.37517 | 2.624 up |
| AT3G42716 | 4.09799 | 5.12166 | 2.033 up |
| AT3G42719 | 2.29936 | 3.80614 | 2.841 up |

|           |         |         |          |
|-----------|---------|---------|----------|
| AT3G42721 | 2.44857 | 3.82046 | 2.588 up |
| AT3G42794 | 0.2466  | 1.66147 | 2.666 up |
| AT3G42935 | 3.29271 | 4.2966  | 2.005 up |
| AT3G43040 | 0.28178 | 1.52927 | 2.374 up |
| AT3G43148 | 1.56903 | 2.62697 | 2.081 up |
| AT3G43152 | 3.61936 | 4.90416 | 2.436 up |
| AT3G43681 | 1.22381 | 2.37095 | 2.214 up |
| AT3G43930 | 2.43204 | 4.08491 | 3.144 up |
| AT3G44035 | 1.22307 | 2.24614 | 2.032 up |
| AT3G44117 | 2.02868 | 3.48425 | 2.742 up |
| AT3G45510 | 0.76546 | 1.84315 | 2.110 up |
| AT3G45638 | 1.98735 | 3.32292 | 2.523 up |
| AT3G45755 | 0.80562 | 2.02208 | 2.323 up |
| AT3G45940 | 4.66493 | 6.22013 | 2.938 up |
| AT3G45950 | 3.87621 | 5.15702 | 2.429 up |
| AT3G49010 | 1.39285 | 2.58225 | 2.280 up |
| AT3G49330 | 1.54092 | 3.35099 | 3.506 up |
| AT3G49780 | 1.44839 | 2.50214 | 2.075 up |
| AT3G49980 | 0.43443 | 1.77062 | 2.524 up |
| AT3G50301 | 1.36631 | 2.9213  | 2.938 up |
| AT3G50560 | 0.87817 | 2.67031 | 3.463 up |
| AT3G51070 | 1.27057 | 2.56236 | 2.448 up |
| AT3G51075 | 2.16114 | 3.40744 | 2.372 up |
| AT3G52690 | 1.65799 | 3.1553  | 2.823 up |
| AT3G54085 | 0.69326 | 2.14924 | 2.743 up |
| AT3G56210 | 0.52992 | 2.21699 | 3.220 up |
| AT3G57460 | 0.97711 | 2.44657 | 2.769 up |
| AT3G57800 | 2.86216 | 3.91683 | 2.077 up |
| AT3G59884 | 0.05346 | 1.1853  | 2.191 up |
| AT3G60560 | 0.25179 | 1.5325  | 2.429 up |
| AT3G61210 | 2.60169 | 4.00153 | 2.638 up |
| AT3G61500 | 0.87654 | 2.43079 | 2.936 up |
| AT3G61825 | 3.21216 | 4.25984 | 2.067 up |
| AT3G61826 | 0.47584 | 1.86493 | 2.619 up |
| AT3G61880 | 1.78573 | 3.78785 | 4.005 up |
| AT3G61920 | 6.92285 | 8.10693 | 2.272 up |
| AT3G62040 | 5.46219 | 6.66795 | 2.306 up |
| AT3G62499 | 0.59924 | 1.95003 | 2.550 up |
| AT4G00005 | 2.28658 | 3.41791 | 2.190 up |
| AT4G00310 | 1.60901 | 4.18956 | 5.981 up |
| AT4G03050 | 2.24738 | 3.77583 | 2.884 up |
| AT4G03060 | 3.00508 | 4.49695 | 2.812 up |
| AT4G03063 | 2.11649 | 3.97207 | 3.618 up |



|           |          |         |          |
|-----------|----------|---------|----------|
| AT4G03470 | 2.25796  | 4.42649 | 4.495 up |
| AT4G03590 | 0.43514  | 1.72629 | 2.447 up |
| AT4G03732 | 2.33689  | 3.56249 | 2.338 up |
| AT4G03745 | 1.80128  | 3.22982 | 2.691 up |
| AT4G03816 | 3.77203  | 4.86891 | 2.138 up |
| AT4G03981 | 1.82313  | 3.18174 | 2.564 up |
| AT4G04170 | 2.16369  | 3.17522 | 2.016 up |
| AT4G04260 | 2.27281  | 3.35074 | 2.111 up |
| AT4G04280 | 0.76167  | 1.81778 | 2.079 up |
| AT4G04290 | 1.07922  | 2.1736  | 2.135 up |
| AT4G04495 | 2.13884  | 3.33695 | 2.294 up |
| AT4G05594 | -0.15362 | 0.89708 | 2.071 up |
| AT4G06502 | 0.4576   | 1.87612 | 2.673 up |
| AT4G06556 | 0.39495  | 1.67838 | 2.434 up |
| AT4G06571 | 1.37292  | 2.3902  | 2.024 up |
| AT4G06574 | 2.95646  | 3.96147 | 2.006 up |
| AT4G06617 | 2.65384  | 4.33948 | 3.216 up |
| AT4G06654 | 1.39609  | 3.0995  | 3.256 up |
| AT4G06708 | 2.63904  | 4.29627 | 3.154 up |
| AT4G07315 | 0.9299   | 2.7997  | 3.654 up |
| AT4G07334 | 0.99629  | 2.18272 | 2.275 up |
| AT4G07339 | 0.35148  | 1.55036 | 2.295 up |
| AT4G07605 | 1.96236  | 3.03934 | 2.109 up |
| AT4G07699 | 3.08218  | 4.13552 | 2.075 up |
| AT4G07917 | 1.92897  | 4.06558 | 4.397 up |
| AT4G07938 | 2.09014  | 3.77776 | 3.221 up |
| AT4G08115 | 4.99393  | 6.03054 | 2.051 up |
| AT4G08347 | -0.041   | 1.09649 | 2.199 up |
| AT4G09410 | 1.53666  | 3.12999 | 3.017 up |
| AT4G10220 | 0.01493  | 1.06018 | 2.063 up |
| AT4G11350 | 0.01586  | 1.14785 | 2.191 up |
| AT4G11890 | 1.0148   | 2.43919 | 2.684 up |
| AT4G15061 | -0.29882 | 1.31836 | 3.067 up |
| AT4G15248 | -0.07017 | 1.17722 | 2.374 up |
| AT4G15300 | 0.13755  | 1.33332 | 2.290 up |
| AT4G16940 | 0.52489  | 2.50716 | 3.951 up |
| AT4G16990 | 1.88233  | 3.34774 | 2.761 up |
| AT4G17470 | 0.43137  | 1.57665 | 2.211 up |
| AT4G18250 | 1.05662  | 3.1263  | 4.197 up |
| AT4G19710 | 1.59766  | 2.76403 | 2.244 up |
| AT4G19750 | 1.48405  | 2.62624 | 2.207 up |
| AT4G19790 | 0.84621  | 2.10971 | 2.400 up |
| AT4G20810 | 4.96594  | 6.03016 | 2.091 up |

|           |          |         |          |
|-----------|----------|---------|----------|
| AT4G21192 | 2.31407  | 3.38526 | 2.101 up |
| AT4G21630 | 2.01674  | 3.49465 | 2.785 up |
| AT4G25631 | 2.62806  | 3.81233 | 2.272 up |
| AT4G26070 | 0.45805  | 2.02162 | 2.955 up |
| AT4G27620 | 3.32673  | 4.5303  | 2.303 up |
| AT4G32860 | 1.35893  | 2.36152 | 2.003 up |
| AT4G33355 | 2.09634  | 3.2717  | 2.258 up |
| AT4G34065 | 0.87081  | 2.23231 | 2.569 up |
| AT4G34415 | 0.0159   | 2.6368  | 6.151 up |
| AT4G34881 | 0.57444  | 2.69992 | 4.363 up |
| AT4G35810 | 1.5947   | 3.14005 | 2.918 up |
| AT4G37682 | 4.34613  | 5.39877 | 2.074 up |
| AT5G01520 | 0.54896  | 2.46598 | 3.776 up |
| AT5G02630 | 3.12539  | 4.5573  | 2.698 up |
| AT5G03500 | 2.01613  | 3.03762 | 2.030 up |
| AT5G04386 | -0.24168 | 1.0584  | 2.462 up |
| AT5G05390 | 1.31192  | 2.44308 | 2.190 up |
| AT5G05920 | 0.52058  | 1.69683 | 2.259 up |
| AT5G06270 | 2.32172  | 3.41169 | 2.128 up |
| AT5G09990 | 1.25385  | 2.46996 | 2.323 up |
| AT5G10500 | 1.95077  | 3.27253 | 2.499 up |
| AT5G11320 | -0.01936 | 1.18644 | 2.306 up |
| AT5G11510 | 0.95618  | 1.97601 | 2.027 up |
| AT5G11977 | -0.24262 | 0.95898 | 2.299 up |
| AT5G13205 | 3.21393  | 4.28766 | 2.104 up |
| AT5G13655 | 1.8295   | 2.89429 | 2.091 up |
| AT5G16030 | 6.98901  | 8.26207 | 2.416 up |
| AT5G16410 | 2.37086  | 3.75238 | 2.605 up |
| AT5G16740 | 0.29474  | 1.95916 | 3.169 up |
| AT5G19097 | 1.46076  | 3.15091 | 3.226 up |
| AT5G19470 | 2.40233  | 3.5763  | 2.256 up |
| AT5G20790 | 3.65854  | 5.24023 | 2.993 up |
| AT5G22044 | -0.31994 | 1.86499 | 4.547 up |
| AT5G22540 | 0.52958  | 2.2885  | 3.384 up |
| AT5G22810 | 0.77827  | 1.86954 | 2.130 up |
| AT5G23650 | 0.30986  | 1.35429 | 2.062 up |
| AT5G24065 | 5.71163  | 6.75608 | 2.062 up |
| AT5G24230 | 1.4243   | 2.62129 | 2.292 up |
| AT5G24560 | 1.5246   | 2.83456 | 2.479 up |
| AT5G25180 | 1.00024  | 2.3656  | 2.576 up |
| AT5G25770 | 4.57641  | 6.15069 | 2.977 up |
| AT5G26020 | 0.17277  | 2.14982 | 3.936 up |
| AT5G26300 | 0.40652  | 1.63616 | 2.345 up |

|           |          |         |          |
|-----------|----------|---------|----------|
| AT5G26620 | 1.95237  | 3.25693 | 2.470 up |
| AT5G26642 | 0.0513   | 2.86243 | 7.018 up |
| AT5G26731 | 2.10225  | 3.1501  | 2.067 up |
| AT5G27037 | 0.60865  | 2.41863 | 3.506 up |
| AT5G27890 | 2.52329  | 3.77145 | 2.375 up |
| AT5G28487 | 0.21046  | 2.28295 | 4.206 up |
| AT5G28550 | -0.07247 | 1.91195 | 3.957 up |
| AT5G28596 | 1.26015  | 3.85032 | 6.021 up |
| AT5G28996 | 4.64248  | 6.50762 | 3.643 up |
| AT5G29022 | 2.27931  | 3.94516 | 3.173 up |
| AT5G29035 | 1.72198  | 3.06538 | 2.537 up |
| AT5G29231 | 2.14819  | 3.52169 | 2.590 up |
| AT5G29646 | -0.27138 | 0.79924 | 2.100 up |
| AT5G30545 | 2.19019  | 3.2903  | 2.143 up |
| AT5G31032 | 2.42415  | 3.89429 | 2.770 up |
| AT5G31355 | 0.98863  | 3.02456 | 4.100 up |
| AT5G31702 | 0.79929  | 2.61728 | 3.525 up |
| AT5G31753 | 0.98261  | 2.57371 | 3.012 up |
| AT5G31919 | 0.55751  | 1.83479 | 2.423 up |
| AT5G32042 | 1.13797  | 2.69036 | 2.933 up |
| AT5G32576 | 2.15995  | 4.04493 | 3.693 up |
| AT5G32591 | 2.95544  | 4.13394 | 2.263 up |
| AT5G32592 | 2.10123  | 3.77936 | 3.200 up |
| AT5G32613 | -0.20231 | 1.25006 | 2.736 up |
| AT5G33200 | -0.31218 | 0.74208 | 2.076 up |
| AT5G33252 | 3.13229  | 4.15346 | 2.029 up |
| AT5G33258 | 0.04222  | 1.47106 | 2.692 up |
| AT5G33385 | 4.05918  | 5.36172 | 2.466 up |
| AT5G33431 | 1.26175  | 2.92922 | 3.176 up |
| AT5G34412 | 1.36941  | 2.69048 | 2.498 up |
| AT5G34602 | 2.62765  | 4.42104 | 3.466 up |
| AT5G34780 | 5.17788  | 6.22446 | 2.065 up |
| AT5G34851 | 1.08766  | 2.46696 | 2.601 up |
| AT5G34855 | 2.56564  | 4.6176  | 4.146 up |
| AT5G34920 | 1.45605  | 3.21037 | 3.373 up |
| AT5G34925 | 0.27642  | 1.4335  | 2.230 up |
| AT5G35725 | 0.57371  | 2.796   | 4.666 up |
| AT5G36730 | 0.21013  | 1.34058 | 2.189 up |
| AT5G38317 | -0.26201 | 1.60228 | 3.640 up |
| AT5G38570 | -0.04741 | 1.03092 | 2.111 up |
| AT5G38780 | 0.81221  | 2.32475 | 2.853 up |
| AT5G39330 | 0.09002  | 1.5033  | 2.663 up |
| AT5G39520 | 0.59213  | 2.05561 | 2.757 up |

|           |          |         |          |
|-----------|----------|---------|----------|
| AT5G39693 | -0.19228 | 1.07687 | 2.410 up |
| AT5G39810 | 1.37038  | 2.84637 | 2.781 up |
| AT5G41494 | 0.70521  | 2.36753 | 3.165 up |
| AT5G42460 | 1.56062  | 3.34523 | 3.445 up |
| AT5G42957 | 1.74247  | 3.26023 | 2.863 up |
| AT5G43690 | -0.2797  | 2.0801  | 5.132 up |
| AT5G44570 | 2.29534  | 4.0616  | 3.401 up |
| AT5G44770 | 0.04237  | 1.94993 | 3.751 up |
| AT5G46000 | 0.71573  | 1.98305 | 2.407 up |
| AT5G46040 | 1.97688  | 3.41821 | 2.715 up |
| AT5G46350 | 1.26748  | 3.10421 | 3.572 up |
| AT5G46630 | 3.63307  | 4.71724 | 2.120 up |
| AT5G46670 | 0.62657  | 1.96104 | 2.521 up |
| AT5G48110 | -0.48859 | 0.81235 | 2.463 up |
| AT5G48890 | 1.66506  | 2.73372 | 2.097 up |
| AT5G49750 | 0.24714  | 1.907   | 3.159 up |
| AT5G50760 | 0.93714  | 2.41246 | 2.780 up |
| AT5G51360 | 1.64068  | 2.65894 | 2.025 up |
| AT5G51780 | -0.05361 | 1.23718 | 2.446 up |
| AT5G53900 | 4.40239  | 5.4848  | 2.117 up |
| AT5G55620 | 5.41188  | 6.4956  | 2.119 up |
| AT5G59050 | 2.00084  | 3.71793 | 3.287 up |
| AT5G59090 | -0.12696 | 1.79644 | 3.793 up |
| AT5G59540 | 3.35243  | 4.40616 | 2.075 up |
| AT5G59650 | 5.12935  | 6.2796  | 2.219 up |
| AT5G60780 | 2.15522  | 3.43992 | 2.436 up |
| AT5G61890 | 3.00127  | 4.04853 | 2.066 up |
| AT5G63040 | 1.06601  | 2.17073 | 2.150 up |
| AT5G63990 | 0.31344  | 1.68888 | 2.594 up |
| AT5G64800 | -0.26121 | 2.04254 | 4.937 up |
| AT5G66930 | 1.98703  | 3.32427 | 2.526 up |
| AT5G67411 | 2.77907  | 3.96531 | 2.275 up |
| ATMG00450 | 3.7589   | 5.21951 | 2.752 up |
| ATMG00513 | 8.81115  | 9.89299 | 2.116 up |
| ATMG00990 | 6.78848  | 8.07567 | 2.440 up |
